# Supplementary material
Source: PubMed Central journal article supplement (PMC8011902)
Supplement: jci-131-137752-s227.pdf [file jci-131-137752-s227.pdf]

## SUPPLEMENTAL INFORMATION

### Supplemental Methods

#### **Mouse studies**

Hearts from 12-16 week old wild type C57/BL6 (Envigo, Horst, The Netherlands and Charles River Wilmington, MA, USA), Cx43<sup>fl/fl</sup> and Cx43<sup>Cre-ER(T)/fl</sup> mice (both kindly provided by Dr. R. Schulz, Justus-Liebig-Universität, Giessen, Germany; both transgenic strains have C57/BL6 background) were excised and subjected to enzymatic digestion (see below). Animals were housed in a licensed facility and handled in accordance with European Directive 2010/63/EU. Experimental methods were approved by the local ethical committees at Ghent University and New York University School of Medicine. Transgenic mice have been described in detail before (1-7). In short, in the Cx43<sup>Cre-ER(T)/fl</sup> mice one coding region of the Cx43 gene was replaced by a fusion construct of the Cre recombinase and a mutated version of the ligand binding domain of the human estrogen receptor (Cre-ER(T)), while the other allele was flanked by loxP sites. Both Cx43 alleles were flanked by loxP sites in Cx43<sup>fl/fl</sup> mice. Both transgenic strains show normal cardiac development to an adult stage. Daily intraperitoneal injection of 3 mg 4-hydroxytamoxifen (4-OHT; Sigma-Aldrich, Bornem, Belgium) dissolved in sunflower oil, for 5 consecutive days, induces Cre-ER(T) activity which progressively deletes the floxed Cx43 allele in adult Cx43<sup>Cre-ER(T)/fl</sup> mice. Hereby circumventing compensatory mechanisms during cardiac development and preventing perinatal death of Cx43-null mice due to right ventricular outflow tract obstruction (8). Experimental work was performed on day 11 after the first injection. 4-OHT-treated Cx43<sup>fl/fl</sup> mice were used as controls.

26 For cardiomyocyte isolation, mice were heparinized (Heparin sodium salt from porcine  
27 intestinal mucosa; Sigma-Aldrich, Bornem, Belgium) and sacrificed by cervical  
28 dislocation. Following thoracotomy, the heart was quickly excised and submerged in  
29 ice-cold  $\text{Ca}^{2+}$ -free isolation solution consisting of (in mmol/L): 130 NaCl, 5.6 KCl, 3.5  
30  $\text{MgCl}_2$ , 10 Glucose, 5 HEPES, 0.4  $\text{Na}_2\text{HPO}_4$ , 20 Taurine and pH adjusted to 7.4 with  
31 NaOH. Subsequently, the aorta was cannulated using a blunt 24G needle, transferred  
32 to a Langendorff apparatus and perfused at a constant flow (~3 mL/min) and  
33 temperature (37°C) with  $\text{Ca}^{2+}$ -free isolation to wash out the remaining blood. Next, the  
34 heart was perfused with  $\text{Ca}^{2+}$ -free isolation solution containing collagenase (Type II,  
35 Worthington, Lakewood, New Jersey, USA), protease (Type XIV from *Streptomyces*  
36 *griseus*; Sigma-Aldrich, Bornem, Belgium) and additional 50 nmol/L of  $\text{Ca}^{2+}$  to activate  
37 the enzymatic activity. Bovine Serum Albumin (BSA; Sigma-Aldrich, Bornem, Belgium)  
38 was included during the enzymatic digestion to dilute the proteolytic activity and to  
39 attain optimal myocyte dissociation with improved cell viability. In the following step,  
40 the heart was removed from the perfusion system and the left ventricle was isolated  
41 from the rest of the heart, minced and incubated in the same enzymatic solution without  
42 protease for 5 minutes. All solutions were oxygenated during the isolation procedure.  
43 At the end, cells were dispersed by gentle agitation, filtered through a nylon mesh and  
44 1 mg/mL BSA was added to the final cell suspension to stop enzymatic activity.  
45 Cardiomyocytes were centrifuged at low speed and resuspended in low- $\text{Ca}^{2+}$  Tyrode  
46 solution consisting of (in mmol/L): 120 NaCl, 5.6 KCl, 5  $\text{MgSO}_4$ , 0.2  $\text{CaCl}_2$ , 5 Na-  
47 Pyruvate, 20 Glucose, 20 Taurine, 10 HEPES and pH adjusted to 7.4 with NaOH. Cell  
48 suspension was allowed to rest for 30 minutes before titrating  $[\text{Ca}^{2+}]_o$  up to 1 mmol/L.  
49  $\text{Ca}^{2+}$ -tolerant cells were stored at room temperature and used within 6 h after isolation.  
50

51 **DNA extraction and Polymerase Chain Reaction**

52 DNA was extracted from mouse tail samples using the KAPA express kit (Sigma-  
53 Aldrich, Bornem, Belgium) and cDNA was amplified using the KAPA2G Fast  
54 Genotyping kit (Sigma-Aldrich, Bornem, Belgium) according to the manufacturer's  
55 instructions.

56

57 For primer sequences, see Supplemental Table 1. All primers were synthesized by  
58 Invitrogen (Ghent, Belgium). The PCR end-products were separated on a 1.5 %  
59 agarose gel and visualized with SYBR Safe DNA gel stain (Invitrogen, Ghent,  
60 Belgium).

61

| Target    | Primer name | Primer sequence              |
|-----------|-------------|------------------------------|
| FI        | UMP         | 5' TCATGCCCGGCACAAGTGAGAC 3' |
|           | UMPR        | 5' TCACCCCAAGCTGACTCAACCG 3' |
| Cre-ER(T) | Cre26       | 5' CCTGGAAAATGCTTCTGTCCG 3'  |
|           | Cre36       | 5' CAGGGTGTTATAAGCAATCCC 3'  |

62 **Supplemental Table 1. Primer sequences**

63

64 **Pig studies**

65 Healthy control pigs (*Sus scrofa domesticus*, Piétrain breed, 40-45 kg; Lovenjoel,  
66 Belgium) were housed and treated according to European Directive 2010/63/EU.  
67 Experimental protocols were approved by the in-house ethical committee (*Ethische*  
68 *Commissie Dierproeven*, KU Leuven).

69

70 Pig left ventricular cardiomyocytes were obtained as described previously (9). Pigs  
71 were heparinized and sacrificed under full anesthesia with an overdose of  
72 pentobarbital, after which the heart was quickly excised. Ventricular myocytes were  
73 enzymatically isolated from a wedge of the left ventricular free wall following

74 cannulation of a perfusing artery (left anterior descending artery or circumflex branch  
75 of the left coronary artery). The tissue was perfused with a constant flow (~4 mL/min)  
76 at 37°C. All solutions were oxygenated. First, the tissue was briefly perfused for 5  
77 minutes with normal Tyrode to wash out the remaining blood (in mmol/L: NaCl 137,  
78 KCl 5.4, MgCl<sub>2</sub> 0.5, CaCl<sub>2</sub> 1.8, HEPES 11.8, glucose 10, pH 7.4 with NaOH), followed  
79 by 30 minutes perfusion with Ca<sup>2+</sup>-free Tyrode's solution (in mmol/L: NaCl 130, KCl  
80 5.4, HEPES 6, MgSO<sub>4</sub> 1.2, KH<sub>2</sub>PO<sub>4</sub> 1.2, glucose 20; pH 7.40 with NaOH). Next, the  
81 tissue was perfused with 1.4 mg/ml collagenase A (Roche, Switzerland) and 0.1 mg/ml  
82 protease (Type XIV from *Streptomyces griseus*; Sigma-Aldrich, Bornem, Belgium) in  
83 Ca<sup>2+</sup>-free isolation solution. The enzyme solution was washed out for 15 minutes with  
84 a low Ca<sup>2+</sup> Tyrode's solution (0.18 mmol/L CaCl<sub>2</sub>). Subsequently, the digested  
85 midmyocardial layers were minced, filtered through a nylon mesh, and the cells  
86 resuspended in low Ca<sup>2+</sup> Tyrode's solution. After 30 minutes, the solution was slowly  
87 replaced with normal Tyrode. Ca<sup>2+</sup>-tolerant cells were stored at room temperature and  
88 used within 10 h after isolation.

89

### 90 **Cx43 gene silencing**

91 Silencing of Cx43 gene was performed by RNA interference as described previously  
92 (10). In short, acutely isolated cardiomyocyte suspension was centrifuged at 300 rpm  
93 for 5 min. The cell pellets containing both cardiomyocytes and fibroblasts were  
94 resuspended in Medium 199 (Sigma-Aldrich) supplemented with 10 % FBS, 10 U/mL  
95 penicillin and 10 µg/mL streptomycin. After 2-h incubation at 37 °C in 5 % CO<sub>2</sub>,  
96 cardiomyocytes remained suspended in the medium while fibroblasts adhered to the  
97 bottom of the polystyrene flask. The fibroblast-depleted suspension was again  
98 collected and cultured at a density of 2 × 10<sup>4</sup> cells/cm<sup>2</sup> in a Petri dish (9.2 cm<sup>2</sup>; TPP

99 Techno Plastic Products AG, Trasadingen, Switzerland) or glass coverslip (2.5 cm<sup>2</sup>)  
100 coated in advance with natural mouse laminin (Invitrogen).

101  
102 Cultured cardiomyocytes were transfected the following day with siRNA using  
103 DharmaFECT lipid reagent (Dharmacon, Thermo Fisher Scientific, Aalst, Belgium).  
104 Two siRNA probes targeting the porcine Cx43 gene *gja1* were synthesized and  
105 annealed by Eurogentec (Luik, Belgium) (Supplemental Table 2). Cultures transfected  
106 with scrambled sequence (siCx43<sup>scr</sup>, Supplemental Table 2) or lipid reagent alone  
107 (MOCK) were used as negative controls. The transfection mixture was removed from  
108 the cultures after 24h treatment.

109

| Peptide               | Sense Sequence            |
|-----------------------|---------------------------|
| siCx43 <sup>1</sup>   | 5'-GAAAGAGGAGGAACUCAA-3'  |
| siCx43 <sup>2</sup>   | 5'-ACUCGAUGCUGGCCAUGAA-3' |
| siCx43 <sup>scr</sup> | 5'-AGAGAUACGAACAAGAGAG-3' |

110 **Supplemental Table 2.** *siRNA probes*

111

## 112 **Human studies**

113 Single myocytes were enzymatically isolated from rejected donor hearts and explanted  
114 hearts. Experimental procedures were approved by the Ethical Committee of the  
115 University Hospital of Leuven with permit number S58824; as this is residual tissue no  
116 informed consent was necessary.

117

118 Human left ventricular cardiomyocytes were prepared with an adjusted protocol from  
119 Sipido et al. (11, 12). Hearts were collected in the operating room. Following explant,  
120 the heart was immediately placed in ice-cold cardioplegic Tyrode's solution (in mmol/L:  
121 NaCl 130, KCl 27, HEPES 6, MgSO<sub>4</sub> 1.2, KH<sub>2</sub>PO<sub>4</sub> 1.2, glucose 10; pH 7.40 with NaOH)  
122 and transported to the lab. A wedge of the left ventricular free wall with its perfusing

123 coronary artery was excised and the artery cannulated in cardioplegic solution. If  
124 possible the left anterior descending coronary was used, otherwise the left circumflex  
125 branch was used. After cannulation, the tissue wedge was perfused with constant flow  
126 (~4 mL/min at 37°C) with Ca<sup>2+</sup> free Tyrode's solution for 30 minutes followed by  
127 enzyme perfusion for 40 minutes (collagenase A 1.4 mg/mL (Roche) and protease type  
128 XIV from *Streptomyces griseus* 0.1 mg/mL (Sigma-Aldrich) in Ca<sup>2+</sup> free solution). The  
129 enzyme solution was washed out with low Ca<sup>2+</sup> solution for 20 minutes. The digested  
130 midmyocardial layers were then dissected, minced, filtered and resuspended in low  
131 Ca<sup>2+</sup> solution (0.18 mmol/L CaCl<sub>2</sub>). After 30 minutes the low Ca<sup>2+</sup> solution was slowly  
132 replaced with a normal Tyrode's solution containing 1.8 mmol/L CaCl<sub>2</sub>. Cells were  
133 stored at room temperature and used within 6 h after isolation.

134

### 135 **Whole-cell patch clamp**

136 Isolated cardiac myocytes were placed in a recording bath and continuously perfused  
137 with normal Tyrode's solution at 37°C. Only rod-shaped cells with clear cross striations,  
138 and without spontaneous contractions or membrane blebs were used for experiments.  
139 Membrane currents and voltage were sampled in whole-cell voltage-clamp mode with  
140 an EPC 7 PLUS patch clamp amplifier (HEKA Elektronik, Germany; for mouse studies)  
141 and Axon Axopatch 200B (Axon Instruments/Molecular Devices, USA; for pig and  
142 human studies). Data were acquired at 4 kHz and digitized using a NI USB-6221  
143 (National instruments, Austin, TX, USA) or Digidata 1440A (Axon  
144 instruments/Molecular Devices, San Jose, CA, USA) data acquisition device to  
145 WinFluor (John Dempster, Strathclyde University) or Clampex 10.2 acquisition  
146 software (Axon instruments/Molecular Devices, San Jose, CA, USA). All currents were  
147 filtered at 1 kHz (7-pole Besselfilter). Amplifier gain was carefully adjusted to allow

148 simultaneous sampling of macroscopic and microscopic currents of interest with ideal  
149 resolution.

150

151 The composition of normal Tyrode's solution used for recording of membrane currents  
152 and membrane voltage was: (in mmol/L) NaCl 137, NaAspartate 2, KCl 5.4, MgCl<sub>2</sub> 0.5,  
153 CaCl<sub>2</sub> 1 for mouse and 1.8 for pig and human, HEPES 11.8, glucose 10 (pH 7.4 with  
154 NaOH). Patch pipettes (2-3 MΩ) were filled with standard pipette solution containing:  
155 (in mmol/L) KAspartate 120, KCl 20, MgCl<sub>2</sub> 0.5, MgATP 5.0, HEPES 10, NaCl 10,  
156 K<sub>5</sub>fluor-4 0.05 (pH 7.20 with KOH). [Ca<sup>2+</sup>]<sub>i</sub> dependence was assessed by adding 10  
157 mmol/L BAPTA to the pipette solution (Supplemental Figure 3). In a subset of  
158 experiments, stably buffered [Ca<sup>2+</sup>]<sub>i</sub> was imposed by adding 5 mmol/L EGTA as a Ca<sup>2+</sup>  
159 buffer and calculating the amount of Ca<sup>2+</sup> to be added (by using Webmax Calculator,  
160 [https://somapp.ucdmc.ucdavis.edu/pharmacology/bers/maxchelator/webmaxc/webm](https://somapp.ucdmc.ucdavis.edu/pharmacology/bers/maxchelator/webmaxc/webmaxcS.htm)  
161 [axcS.htm](https://somapp.ucdmc.ucdavis.edu/pharmacology/bers/maxchelator/webmaxc/webmaxcS.htm)) in order to obtain solutions with [Ca<sup>2+</sup>]<sub>i</sub> of 50, 250, 500 or 1000 nmol/L. Cells  
162 were stimulated to steady-state by depolarizing steps (25 ms for mouse (mimicking the  
163 short action potential) and 200 ms for pig and human) from -70 to +10 mV at 1 Hz for  
164 2 minutes, followed by fast caffeine application (10 mmol/L for 8 s) at -70 mV (Figure  
165 1A). Addition of the 2 min stimulation train prevented channel rundown during the  
166 recording (Supplemental Figure 2A). Alternatively, in cells that exhibited unitary current  
167 activity, the stimulation period was followed by a 15 s resting period at -70 mV to allow  
168 diastolic Ca<sup>2+</sup> release from the SR and resulting currents (Figure 6A). For study of  
169 voltage dependence and channel selectivity, recordings were performed following 15  
170 pulses pacing at 1 Hz and under conditions of K<sup>+</sup>-channel blockade or exclusion of  
171 major charge-carrying ions. In a subset of experiments, protocols were repeated at  
172 different frequencies and in the presence or absence of ISO (1 μmol/L for mouse

173 studies and 10 nmol/L for pig and human studies) (Figure 2 and 3). Delayed  
174 afterdepolarizations (DADs) were recorded in current-clamp mode following a 2 minute  
175 stimulation period in voltage-clamp mode. Different conditions were applied in random  
176 order to minimize time-dependent changes following isolation.

177

### 178 **[Ca<sup>2+</sup>]<sub>i</sub> imaging**

179 [Ca<sup>2+</sup>]<sub>i</sub> was reported making use of fluo-4 loaded into the cell through the patch pipette  
180 in order to avoid compartmentalization, bleaching and loss of dye. Proper and stable  
181 dye loading was ensured before initiating experiments. For mouse experiments,  
182 widefield fluorescence was simultaneously acquired during electrophysiology using an  
183 inverted epifluorescence microscope (Motic AE31 Trinocular) with a custom-built  
184 imaging module. Dye was excited with a Mercury arc lamp (Nikon) at 475±35 nm. The  
185 dichroic mirror under the objective (Nikon x40/1.3 oil immersion objective lens) was  
186 centered at 510 nm. Fluo-4 fluorescence was sampled at 535±35 nm using a CCD  
187 camera (CoolSnap HQ2; Photometrics, AZ, USA) at 100 Hz. For pig and human  
188 experiments, confocal line scan images were simultaneously recorded during  
189 electrophysiology using a Zeiss Axiovert 100M inverted microscope with a x40/1.3 oil-  
190 immersion objective and a Zeiss LSM 510 confocal laser point-scanning system. Fluo-  
191 4 was excited at 488 nm with a 25 mW argon laser. Cells were scanned along the  
192 longitudinal axis, orthogonal to the Z lines, avoiding scanning through nuclei. Line  
193 scans were recorded at 650 Hz with a pixel size of 0.2–0.3 μm. The fluorescence  
194 signals obtained with fluo-4 were corrected for the background fluorescence recorded  
195 after seal formation, and normalized for baseline values at rest before stimulation.

196

### 197 **Macropatch recording**



198 A subset of electrophysiological recordings was performed in the macropatch cell-  
199 attached configuration, as described previously (13-15). Pipette resistance was  
200 maintained within the range of 1.9 to 2.1 M $\Omega$ , to facilitate reproducibility between  
201 experiments. Only recordings obtained under seal resistances higher than 2 G $\Omega$  were  
202 used in this study. Recording pipettes were filled with Tyrode's solution with K<sup>+</sup>  
203 replaced by Cs<sup>+</sup>, TEA<sup>+</sup> and Ba<sup>2+</sup>. Cells were maintained in a solution containing 0.33  
204 mM NaH<sub>2</sub>PO<sub>4</sub>, 5 mM HEPES, 1.8 mM CaCl<sub>2</sub> and 140 mM KCl, pH 7.4 with KOH, thus  
205 depolarizing the membrane potential to a value estimated to be near zero. In this  
206 configuration (recording electrode in the extracellular space), voltage command pulses  
207 of negative polarity were necessary to depolarize the inside of the cell, and the elicited  
208 currents were positive when inward. Following the standard convention, membrane  
209 potential is reported as the difference between the inside of the cell, and a distant  
210 ground in the bath, and current direction and polarity is reported as if recorded from  
211 the cell interior. Recordings were obtained either from the end of the cell, in the area  
212 previously occupied by the ID, or from the lateral membrane (LM) section of the cell.  
213 Recordings in cell pairs were obtained from the site of cell-cell contact. Cells were  
214 stepped to different voltages from a holding potential of -70 mV. Caffeine and TAT-  
215 conjugated Cx mimetic peptides were added to the bath solution when applicable.  
216 Currents were sampled at 10 kHz and low-pass filtered at 1 kHz (7-pole Besselfilter).  
217 Amplifier gain was carefully adjusted to allow single channel recording with ideal  
218 resolution.

219

### 220 **Scanning ion conductance microscopy and super-resolution patch clamp**

221 Scanning ion conductance microscopy (SICM) is a non-contact scanning probe super-  
222 resolution (<20 nm) technique that produces a 3-dimensional topographic image of the

223 surface of living cells based on the principle that the ion flow through the tip of a  
 224 nanopipette is determined by the distance to the sample surface (for a detailed  
 225 description of the technique, see Bhargava et al. (16)). After surface scanning,  
 226 nanopipette was clipped in a controlled manner and patch clamping was performed at  
 227 a chosen location just distally from the last Z-groove. Recording solutions and current  
 228 sampling and filtering were identical to cell-attached macropatch technique. Only  
 229 recordings obtained under seal resistances higher than 5 GΩ were used in this study.

230

### 231 **Peptide tools**

232 Synthetic Cx mimetic peptides (Supplemental Table 3) used in this study were all  
 233 obtained from Pepnome (Hong Kong, China). For whole-cell recording, non-TAT-  
 234 conjugated peptides were all added to the pipette solution in a concentration of 100  
 235 μmol/L. Except <sup>10</sup>Panx1, which was pre-incubated at 200 μmol/L for 30 minutes. For  
 236 macropatch experiments, <sup>10</sup>Panx1 was included in the pipette solution at 200 μmol/L.  
 237 TAT-conjugated peptides were all added to the bath solution in a concentration of 80  
 238 μmol/L. The identity of the peptides was confirmed by mass spectrometry and purity  
 239 was ≥ 90 %. Proper loading of peptides included in the patch pipette and action of  
 240 peptides was ensured by waiting sufficient time before start of protocols. Different  
 241 interventions were tested in random order to minimize time-dependent changes in  
 242 channel expression, distribution and function following cell isolation.

243

| Peptide                    | Sequence                                             |
|----------------------------|------------------------------------------------------|
| Gap19                      | <sup>128</sup> KQIEIKKFK <sup>136</sup>              |
| Gap19 <sup>I130A</sup>     | <sup>128</sup> KQAEIKKFK <sup>136</sup>              |
| CT9                        | <sup>374</sup> RPRPDDLEI <sup>382</sup>              |
| <sup>10</sup> Panx1        | <sup>74</sup> WRQAAFVDSY <sup>83</sup>               |
| TAT-Gap19                  | YGRKKRRQRRR- <sup>128</sup> KQIEIKKFK <sup>136</sup> |
| TAT-Gap19 <sup>I130A</sup> | YGRKKRRQRRR- <sup>128</sup> KQAEIKKFK <sup>136</sup> |
| TAT-CT9                    | YGRKKRRQRRR- <sup>374</sup> RPRPDDLEI <sup>382</sup> |

244 **Supplemental Table 3. Peptide sequences**

245

246 **Analysis of membrane currents**

247 For single channel and Na<sup>+</sup>/Ca<sup>2+</sup> exchange (NCX) current analysis, all qualitative  
248 traces were included in the analysis. Complex electrophysiological signals containing  
249 NCX and unitary currents were automatically separated and analyzed using a novel  
250 cross-correlation and threshold detection algorithm written in python using the  
251 packages numpy, scipy, PyQt and matplotlib. For unitary currents, threshold was set at  
252 five times standard deviation of noise distribution and allows reliable detection of ~99%  
253 of unitary current events (17). Elementary current transitions ( $\Delta i$ ) were fit by an error  
254 function and unitary conductances were calculated as:  $\gamma = \Delta i / V_m$ . From these data, we  
255 constructed all-event transition conductance histograms. Distributions were fit by  
256 probability density functions assuming independent channel opening (18, 19). Event  
257 probability was calculated as the summed open time divided by the duration of the time  
258 window of interest. Single-channel open probability was calculated for recordings in  
259 cell-attached configuration by dividing event probability by the amount of channels in  
260 the patch as estimated by the level of stacked events. Availability is defined as the  
261 fraction of sweeps containing at least 1 channel opening. Time to first event was  
262 determined as time from start of NCX current to first unitary current transition. SR Ca<sup>2+</sup>  
263 content was measured by integrating the inward NCX current during fast caffeine  
264 application (10 mmol/L).

265

266 **Confocal microscopy**

267 Freshly isolated left ventricular cardiomyocytes were fixed with 2% paraformaldehyde  
268 (PFA) for 15 minutes. Subsequently, cells were washed 3 times and background  
269 fluorescence was quenched with 50 mM glycine, cells permeabilized using 0.2% Triton

270 X-100 and blocked with 10% goat serum and 1% BSA in PBS (blocking buffer) for 1  
271 hour at room temperature. Cells were washed three times between every step. Primary  
272 antibody (rabbit Cx43, C6219, 1:500; Sigma-Aldrich, Bornem, Belgium) diluted in  
273 blocking buffer was incubated overnight at 4°C. Cells were washed 3 times and  
274 incubated with secondary antibody (Alexa Fluor 488, A-11008, 1:200; Life  
275 Technologies) in blocking buffer for 1 hour at room temperature. Next, cells were  
276 washed three times and incubated with Phalloidin-Rhodamin (1:200; R415, Life  
277 Technologies) in blocking buffer for 45 minutes at room temperature. Cells were then  
278 washed 3 times before imaging. Confocal micrographs were acquired with a  
279 commercially available Leica system (TCS SP8x) using x63 objective within respective  
280 excitation-emission spectra. Z-sections were taken every 0.5 µm.

281

### 282 **Super-resolution fluorescence microscopy**

283 22-squared coverslips (Fisherbrand) were coated with 10 µg/mL laminin (BD  
284 Biosciences) for 30 min. Isolated adult left ventricular cardiomyocytes were plated  
285 on the coverslips and allowed to attach to the surface for 45 min at 37 °C. Cells were  
286 fixed with 4% PFA in PBS for 10 min, washed 3 times with PBS and left in PBS until  
287 further processing for immunostaining. Samples were permeabilized with 0.1%  
288 Triton in PBS for 10 min at room temperature. Blocking was done with PBS  
289 containing 2% bovine serum albumin, 2% glycine, and 0.2% gelatin for 30 min.  
290 Primary antibodies rabbit anti-Cx43 (1:200, AB1728, Millipore), mouse anti-Cx43  
291 (1:100, clone 4E6.2, MAB3067, Millipore), rabbit anti-NCX (1:25, sc-32881, Santa  
292 Cruz Biotechnology), rabbit anti-Cav1.2 (1:200, ACC-003, Alomone), anti-  
293 phospholamban (1:100, sc-393990, Santa Cruz Biotechnology), rabbit anti-JPH2  
294 (1:50, 40-5300, Thermofisher), anti-caveolin-3 (1:100, 610421, BD Bioscience),

295 mouse anti- $\alpha$ -actinin (1:100, A7811, Sigma-Aldrich) and mouse anti-RyR2 (1:100,  
296 MA3-916, Thermofisher) were diluted in blocking solution and incubated for 1 h at  
297 room temperature. Primary antibodies were washed with PBS and secondary  
298 antibodies anti-mouse or anti-rabbit Alexa Fluor 647 (1:10000, A-21235 or A-21244,  
299 Life Technologies), anti-mouse or anti-rabbit Alexa Fluor 568 (1:10000, A-11004 or  
300 A-11011, Life Technologies) and anti-mouse Alexa Fluor 488 (1:5000, A-11008, Life  
301 Technologies) were incubated for 30 min at room temperature. For triple staining,  
302 mouse anti-RyR2 (MA3-916, Thermofisher) directly conjugated to Alexa Fluor 647  
303 was additionally used (1:100, A20186, Thermofisher). For super-resolution  
304 fluorescence imaging, coverslips were mounted on slides with imaging buffer:  
305 200 mM mercaptoethylamine and an oxygen scavenging system: 0.4 mg/ml glucose  
306 oxidase, 0.02 mg/ml catalase and 10% (wt/wt) glucose. Samples were imaged in a  
307 custom-built microscope set up equipped with a Leica DM3000 microscope, a  
308 556 nm and 640 laser (OEM Laser Systems) and an HCX PL APO  $\times$ 100 NA = 1.47  
309 OIL CORR TIRF objective. Total internal reflection fluorescence or highly inclined  
310 illumination modes were used to excite the samples and improve signal-to-noise  
311 ratio. A Prime Scientific CMOS camera (Photometrics) was used to image different  
312 color movies containing 2000 frames. Each movie was reconstructed at 20 nm,  
313 processed with a smoothing filter and adjusted for brightness and contrast using  
314 automated MATLAB and ImageJ routines. Cluster detection (cluster size and density  
315 – defined as the number of clusters per unit of area) and distance analysis was  
316 performed using automated ImageJ and Python routines. Analysis of the number of  
317 RyR units per cluster was achieved with the density-based clustering algorithm  
318 DBSCAN, which groups together points that are closely packed together (with many  
319 nearby neighbors), marking as outliers points that lie alone in low-density regions

320 (nearest neighbors too far away). DBSCAN uses two input parameters—Eps and  
321 MinPts—and determines that a point is in a cluster if at least MinPts points are within  
322 a distance of Eps. We used an Eps value of 50 nm and a Minpts of 10 for DBSCAN  
323 analysis (20).

324

### 325 **Single hemichannel modeling**

326 Cx43 hexamers were generated using SWISS-MODEL (21) and SymmDock (22)  
327 based on murine Cx43 sequence (UniProtKB P23242). Hexagonal grids of Cx43  
328 hemichannels with variable interspacing were used to estimate number of Cx43  
329 hemichannels per dyad.

330

### 331 **Electron Microscopy**

#### 332 *Electron Microscopy Sample Preparation*

333 Mice were anesthetized with sodium pentobarbital, perfused with 4%  
334 paraformaldehyde in PBS and then euthanized by excision of the heart. The perfused  
335 heart was cut into 1 mm<sup>3</sup> and placed in a fixative solution containing 2%  
336 paraformaldehyde and 2.5% glutaraldehyde in phosphate buffer (PB, pH 7.2). Fixed  
337 mouse heart was further processed with modified OTTO (23), and embedded in  
338 Durcupan. In brief, the heart tissue was washed with 0.1 mol/L PB, post fixed in 2%  
339 OsO<sub>4</sub>/ 1.5% potassium ferrocyanide for 1.5 h at room temperature, then stained with  
340 freshly made 1% tannic acid (EMS) in PB for two consecutive steps with 2 hours each  
341 step at 4°C to allow for additional staining. The tissue was then washed in ddH<sub>2</sub>O,  
342 placed in 2% aqueous OsO<sub>4</sub> for 40 min at room temperature, and *en bloc* stained in  
343 1% aqueous uranyl acetate at 4°C overnight. The tissues were then washed with  
344 ddH<sub>2</sub>O, dehydrated in a series of ethanol solutions (30, 50, 70, 85, 95, 100, 100%; 10

345 min each, on ice) and replaced with ice-cold dry acetone for 10 min, followed by 10  
346 min in acetone at room temperature. The sample was gradually equilibrated with  
347 Durcupan ACM Araldite embedding resin (Electron Microscopy Sciences, EMS, PA)  
348 and embedded in fresh made 100% Durcupan.

349

#### 350 *Serial Block-Face Scanning Electron Microscopy (SBF-SEM)*

351 The sample block was trimmed and thin sections were cut on slot grids to identify the  
352 area of interest. The sample block was then mounted on an aluminum specimen pin  
353 (Gatan, Pleasanton, CA) using silver conductive epoxy (Ted Pella Inc.) to electrically  
354 ground the tissue block. The specimen was trimmed again with pyramid shape and  
355 coated with a thin layer of gold/palladium (Denton Vacuum DESK V sputter coater,  
356 Denton Vacuum, LLC., NJ, USA). Serial block face imaging was performed using  
357 Gatan OnPoint BSE detector in a Zeiss GEMINI 300 VP FESEM equipped with a Gatan  
358 3View automatic microtome unit. The system was set to cut sections with 100 nm  
359 thickness, imaged with gas injection setting at 65% (3.9E-03 mbar) with Focus Charge  
360 Compensation to reduce the charge, and images were recorded after each round of  
361 section from the block face using the SEM beam at 1.2 keV with a dwell time of 1.0  
362  $\mu\text{s}/\text{pixel}$ . Each frame is 20 x 25  $\mu\text{m}$  with pixel size of 2 nm. Data acquisition occurred  
363 in an automated way using the Auto Slice and View G3 software. A stack of 150 slices  
364 was aligned and assembled using ImageJ. A volume of roughly 20x25x15  $\mu\text{m}^3$   
365 dimensions was obtained from the tissue block.

366

#### 367 **Cell culture**

368 HEK cells overexpressing RyR2 under the control of a tetracycline-inducible promoter  
369 (HEK RyR2 cells) were produced as described in (24) and kindly provided by the group

370 of Dr. S.R. Wayne Chen. HEK RyR2 cells were cultured in Dulbecco's modified eagle  
371 medium (DMEM) supplemented with 10% serum, penicillin/streptomycin (100 IU/ml),  
372 glutamax (2 mmol/L) at 37°C with 5% CO<sub>2</sub>. One day after plating the medium was  
373 replaced with medium containing 1 µg/ml tetracycline. Cells were used for intracellular  
374 Ca<sup>2+</sup> measurements after 24 hours.

375

### 376 **Fura2-AM intracellular Ca<sup>2+</sup> measurements**

377 HEK RyR2 cells seeded in clear bottom black 96 well plates (Greiner), were loaded for  
378 30 min at room temperature with 1.25 µmol/L Fura-2AM in modified Krebs solution  
379 (containing (in mmol/L) NaCl 150, KCl 5.9, 1.2 MgCl<sub>2</sub> 1.2, HEPES 11.6, glucose 11.5  
380 and CaCl<sub>2</sub> 1.5 (pH 7.3 with NaOH). After washing the cells twice with modified Krebs  
381 solution, de-esterification was performed by incubating in Fura-2AM free modified  
382 Krebs solution for 30 min at room temperature. Intracellular Ca<sup>2+</sup> measurements were  
383 performed using a multi-mode microplate reader Flexstation 3 (Molecular Devices) by  
384 alternately excitation at 340 and 380 nm and measuring emitted fluorescence at 510  
385 nm. Additions (peptides, EGTA and caffeine) were performed as indicated in the  
386 figures at the indicated concentrations. When pre-treatment was necessary the  
387 peptides were included during the de-esterification step. All traces are shown as the  
388 ratio of measured emission of Fura-2 (F<sub>340</sub>/F<sub>380</sub>). Experiments were repeated 5 times  
389 independently measuring each condition in duplicate on each day.

390

### 391 **Western blot analysis**

392 Following enzymatic digestion, mouse atria and right ventricle were snap frozen in  
393 liquid nitrogen and stored at -80°C. Tissue and cell lysates were prepared by treating  
394 the samples with RIPA buffer (25 mmol/L Tris, 50 mmol/L NaCl, 0.5% NP-40, 0.5%



395 deoxycholate, 0.1% SDS, 5.5%  $\beta$ -glycerolphosphate, 1 mmol/L dithiothreitol, 15  $\mu$ L/mL  
396 protease inhibitor cocktail (Sigma-Aldrich, Bornem, Belgium), 20  $\mu$ L/mL of  
397 phosphatase inhibitor cocktail (Sigma-Aldrich, Bornem, Belgium) and 20  $\mu$ L/mL mini  
398 EDTA-free protease inhibitor cocktail), homogenization and sonication. Protein  
399 concentration was determined with a Biorad DC protein assay kit and absorbance was  
400 measured with a 590 nm long-pass filter. Proteins were separated by electrophoresis  
401 on a 4-12% Bis-Tris gel (Invitrogen, Ghent, Belgium) and transferred to a nitrocellulose  
402 membrane (GE Healthcare, Diegem, Belgium). Blots were probed with primary  
403 antibody (1:5000 rabbit anti-Cx43 (C6219, Sigma), 1:250 rabbit anti-Panx1 (MA5-  
404 35664, Invitrogen), 1:250 mouse anti-polycystin-2 (sc-28331, Santa Cruz; kindly  
405 provided by Dr. J-P Decuypere, KU Leuven, Belgium) or 1:500 rabbit anti-PKD2L2  
406 (OSP00010W, Thermofisher), followed by alkaline phosphatase conjugated goat anti-  
407 rabbit IgG (1:4000; A3687, Sigma-Aldrich, Bornem, Belgium) or HorseRadish  
408 Peroxidase (HRP) conjugated goat anti-rabbit or anti-mouse IgG (1:5000; sc-2004 or  
409 sc-2005, Santa Cruz Biotechnology, Heidelberg, Germany) and detection was  
410 performed with nitro blue tetrazolium/5-bromo-4-chloro-3-indolyl phosphate reagent  
411 (Invitrogen, Ghent, Belgium) or chemiluminescence respectively. Blots were treated  
412 with SYPRO® Ruby protein blot stain (Molecular Probes, Ghent, Belgium) or 1:1000  
413 mouse anti-vinculin (V9131, Sigma-Aldrich, Bornem, Belgium) to verify loading.

414

## 415 **Mathematical framework**

### 416 *Electrical effect of hemichannel opening*

417 We determined the electrical impact of hemichannel opening making use of a  
418 membrane equivalent scheme (Supplemental Figure 1).

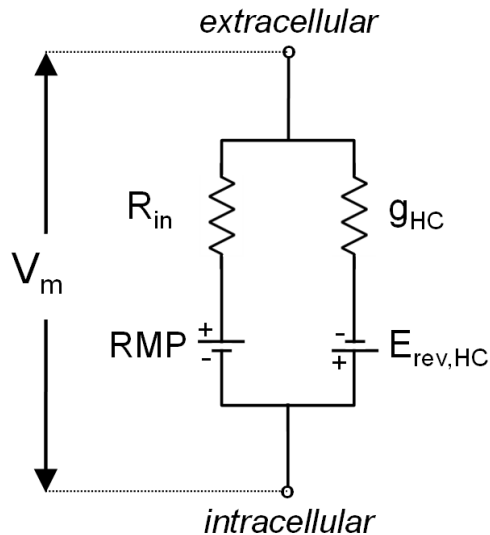

419

420 **Supplemental Figure 1.** Electrical equivalent scheme of a hemichannel in the  
 421 sarcolemma. Two current paths are shown: the left arm contains a battery generating  
 422 the resting membrane potential (RMP = -70 mV) in series with the cell input resistance  
 423 ( $R_{in} = 94.92 \pm 9.76 \text{ M}\Omega$ ,  $N/n_{\text{mouse}} = 23/75$ , in line with reported ~40-100 M $\Omega$  in rodent  
 424 ventricular cardiomyocytes (25-29); at resting  $V_m$  the main contributor to  $R_{in}$  is  $I_{K1}$  (30)).  
 425 The right arm is composed of a hemichannel resistance (conductance  $g_{HC}$  of  $227 \pm$   
 426  $7 \text{ pS}$ ,  $N/n_{\text{mouse}} = 90/281$ ,  $37^\circ\text{C}$ ) in series with a battery that has zero reversal potential  
 427 ( $E_{\text{rev,HC}} = 0 \text{ mV}$ ).

428

429 Application of Kirchhoff's junction and loop rules allowed to calculate the voltage drop  
 430 over the cardiomyocyte input resistance ( $R_{in}$ ) as  $\Delta V_m = -V_m \cdot R_{in} / (R_{in} + 1/g_{HC})$ , yielding a  
 431 1.48 mV depolarizing shift from -70 mV per hemichannel using the data given in the  
 432 legend (Supplemental Figure 1). We verified this estimate by including a single human  
 433 hemichannel with  $228.1 \pm 4.1 \text{ pS}$  conductance ( $N/n_{NF} = 20/64$ ) into two computational  
 434 models of human ventricular cardiomyocyte electrophysiology: TNNP04 (31) and ORd  
 435 (32), which resulted in 1.75 mV depolarization per hemichannel. We took an average  
 436 of 1.6 mV depolarization per hemichannel taking into account the two distinct  
 437 approaches. Stacked hemichannel openings will result in the summing of these  
 438 depolarizing potentials.

439

440 *Ca<sup>2+</sup> current through a single hemichannel*

441 At -70 mV, the current through a single hemichannel is -15.9 pA (inward current) in  
 442 mouse cardiomyocytes (37°C), which is carried by several ionic components including  
 443 Na<sup>+</sup>, Ca<sup>2+</sup>, K<sup>+</sup>, Cl<sup>-</sup> and Aspartate (Asp<sup>-</sup>) as the main potential contributors.

444

445 To determine the fraction of the hemichannel current carried by Ca<sup>2+</sup>, we first  
 446 considered to use a Goldman-Hodgkin-Katz based approach to calculate P<sub>Ca</sub>/P<sub>Na</sub> (33,  
 447 34) based on the observed shift in reversal potential (E<sub>rev</sub>) of ~9.5 mV upon increasing  
 448 extracellular Ca<sup>2+</sup> from 1 to 5 mM (Figure 1). However, such estimates would only be  
 449 valid at E<sub>rev</sub> where the net current flow equals zero, but not at -70 mV that was used in  
 450 all present experiments. As a result, we determined the Ca<sup>2+</sup> current (I<sub>Ca,HC</sub>) relative to  
 451 the Na<sup>+</sup> current (I<sub>Na,HC</sub>) using an alternative approach that was based on the ratio of  
 452 the respective steady state electrodiffusion flux equations for these ions (35):

$$453 \quad \frac{I_{Ca,HC}}{I_{Na,HC}} = \frac{z_{Ca} D_{Ca} (\Delta C_{Ca} + z_{Ca} \bar{C}_{Ca} \frac{F}{RT} V_m)}{z_{Na} D_{Na} (\Delta C_{Na} + z_{Na} \bar{C}_{Na} \frac{F}{RT} V_m)} \quad (1)$$

454 with aqueous diffusion constants D<sub>Ca</sub> and D<sub>Na</sub> of 642 and 540 μm<sup>2</sup>/s (37°C) determined  
 455 under standardized conditions (617 and 519 μm<sup>2</sup>/s respectively at 25°C (36)), z<sub>Ca</sub> and  
 456 z<sub>Na</sub> as corresponding valences, ΔC<sub>Ca</sub> and ΔC<sub>Na</sub> as transmembrane concentration  
 457 differences, and  $\bar{C}_{Ca}$  and  $\bar{C}_{Na}$  average concentrations in the pore (taken as half  
 458 between outside and inside). This yields a I<sub>Ca,HC</sub>/I<sub>Na,HC</sub> ratio of ~0.057, i.e. the Ca<sup>2+</sup>  
 459 current is ~5.7% of Na<sup>+</sup> current. We next estimated the contribution of K<sup>+</sup>, Cl<sup>-</sup> and Asp<sup>-</sup>  
 460 based on their driving forces (V<sub>m</sub> - E<sub>Nernst</sub>; Supplemental Table 4) and the hemichannel  
 461 conductance.

462

| Ion              | E <sub>Nernst</sub> (mV) | V <sub>m</sub> - E <sub>Nernst</sub> (mV)<br>(V <sub>m</sub> = -70 mV) |
|------------------|--------------------------|------------------------------------------------------------------------|
| Na <sup>+</sup>  | 71.5                     | -141.5                                                                 |
| Ca <sup>2+</sup> | 132.3                    | -202.3                                                                 |

|                  |       |        |
|------------------|-------|--------|
| K <sup>+</sup>   | -87.8 | 17.8   |
| Cl <sup>-</sup>  | -41.3 | -28.7  |
| Asp <sup>-</sup> | 109.4 | -179.4 |

463 **Supplemental Table 4.** Nernst potentials and driving forces (37°C)

464

465 The Cl<sup>-</sup> current was corrected taking into account a P<sub>Cl</sub>/P<sub>K</sub> ratio of 0.13 as reported by  
466 Wang & Veenstra (37). Correction for Asp<sup>-</sup>, was based on a glutamate permeability of  
467 1.4 times less than the Cl<sup>-</sup> permeability (37). The Ca<sup>2+</sup> current was then calculated from  
468 the summed Na<sup>+</sup>, K<sup>+</sup>, Cl<sup>-</sup> and Asp<sup>-</sup> current contributions. The Ca<sup>2+</sup> over Na<sup>+</sup> ratio  
469 ( $I_{Ca,HC}/I_{Na,HC} = \sim 0.057$ ; see above), allowed to express the equation in terms of Ca<sup>2+</sup>  
470 current ( $I_{Ca,HC}$ ), yielding  $\sim 0.84$  pA per hemichannel for 1 mM extracellular Ca<sup>2+</sup> (mice  
471 experiments). For the pig and human experiments, extracellular Ca<sup>2+</sup> was 1.8 mM,  
472 which gave a hemichannel Ca<sup>2+</sup> current of  $\sim 1.46$  pA (all values at  $V_m = -70$  mV and 37  
473 °C). Based on this estimate, we explored the impact of hemichannel Ca<sup>2+</sup> currents in  
474 a range of 0 to 3 pA on hemichannel-dyad microdomain Ca<sup>2+</sup> elevation and its  
475 consequent effects on NCX current and Ca<sup>2+</sup> waves (Figure 9).

476

477 *Hemichannel associated Ca<sup>2+</sup> elevation*

478 For assessing the impact of hemichannel associated Ca<sup>2+</sup> entry, we constructed a cell  
479 model with 2 separate compartments: a subsarcolemmal space interfacing with dyads  
480 at the perinexal microdomain and a cytoplasmic compartment with dyads and  
481 myofibrils deeper inside the cell. Mathematical parameters are summarized in  
482 Supplemental Table 5. Cytoplasmic and microdomain geometry were obtained from  
483 the mouse experiments.

484 Ca<sup>2+</sup> entry ( $J_{HC}$ ) through a single Cx43 hemichannel was calculated as (38-40):

485 
$$J_{HC} = \frac{I_{Ca,HC}}{z_{Ca}F} \quad (2)$$

486 The consequent whole-cell  $[Ca^{2+}]$  increase is provided by dividing hemichannel-  
487 associated  $Ca^{2+}$  entry by  $Ca^{2+}$ -accessible cytoplasmic volume ( $V_{acc}$ ) (41-43):

488 
$$[Ca^{2+}] = \frac{J_{HC}\tau_{o,HC}}{V_{acc}} \quad (3)$$

489 For calculation of microdomain-associated  $Ca^{2+}$ , we incorporated geometric  
490 approximations of the dyad and treated the channel as a point source from which  $Ca^{2+}$   
491 diffuses away with hemispherical contours of equal concentration (44). The  
492 concentration of  $Ca^{2+}$  at distance  $r$  from the channel then calculates as:

493 
$$[Ca^{2+}] = \frac{J_{HC}\tau_{o,HC}}{2\pi r r_{PN} D_{sub}} \quad (4)$$

494 where  $J_{HC}$  is  $Ca^{2+}$  influx through a single hemichannel,  $r_{PN}$  is the thickness of the dyad  
495 at the perinexal microdomain and  $D_{sub}$  is the  $Ca^{2+}$  diffusion constant in the  
496 subsarcolemmal compartment.

497

498 In the subsarcolemmal space,  $Ca^{2+}$  diffuses and binds to stationary (phospholipids,  
499 SERCA) and mobile (calmodulin, ATP, fluo-4)  $Ca^{2+}$  buffers. In the cytoplasm,  
500 stationary buffers additionally include troponin C and myosin.  $Ca^{2+}$  buffering in both  
501 compartments was based on previously published values (summarized in  
502 Supplemental Table 5) and the relationship between total and free  $Ca^{2+}$  ( $[Ca^{2+}]_{total}$  and  
503  $[Ca^{2+}]_i$  respectively) is provided by the following equation (45-48):

504 
$$[Ca^{2+}]_{total} = a + \sum B_{max,i} \frac{[Ca^{2+}]_i}{K_{d,i} + [Ca^{2+}]_i} \quad (5)$$

505 where 'a' is an offset because the relationship cannot be determined for values of  
506  $[Ca^{2+}]_i$  below the resting level,  $B_{max,i}$  is the total concentration of buffer 'i' and  $K_{d,i}$  is the  
507 concentration of  $Ca^{2+}$  at which half of the buffer 'i' is occupied by  $Ca^{2+}$ .

508

509 NCX current ( $I_{NCX}$ ) activated by hemichannel opening was calculated as (49-52):

$$510 \quad I_{NCX} = \frac{FV_{dyad,PN}}{C_m} J_{NCX} \quad (6)$$

511 where  $V_{dyad,PN}$  is dyadic volume at the perinexus,  $C_m$  is membrane capacitance and  
 512  $J_{NCX}$  is  $Na^+$ - $Ca^{2+}$  exchange flux.

$$513 \quad J_{NCX} = g_{NCX} A_{NCX} \frac{e^{\varepsilon VF/RT} [Na^+]_i^3 [Ca^{2+}]_o - e^{\frac{(\varepsilon-1)VF}{RT}} [Na^+]_o^3 [Ca^{2+}]_i}{(1 + k_{sat} e^{(\varepsilon-1)VF/RT}) H} \quad (7)$$

514 where

$$515 \quad H = K_{m,cao} [Na^+]_i^3 + K_{m,nao}^3 [Ca^{2+}]_i \left( 1 + \frac{[Ca^{2+}]_i}{K_{m,cai}} \right) + K_{m,cai} [Na^+]_o^3 \left( 1 + \frac{[Na^+]_i^3}{K_{m,nai}^3} \right)$$

$$516 \quad + [Na^+]_i^3 [Ca^{2+}]_o + [Na^+]_o^3 [Ca^{2+}]_i \quad (8)$$

517 and

$$518 \quad A_{NCX} = \frac{1}{1 + \left( \frac{K_{mCaAct}}{[Ca^{2+}]_i} \right)^{n_{Hill}}} \quad (9)$$

519 Integration of this NCX current over the time window of hemichannel opening activity  
 520 yields the NCX charge transfer provoked by hemichannel  $Ca^{2+}$  entry.

521

### 522 *Hemichannel associated $Ca^{2+}$ induced SR $Ca^{2+}$ release*

523 We adapted the method described by Cannell et al. to assess activation of RyRs due  
 524 to hemichannel  $Ca^{2+}$  entry at the perinexal microdomain (53), with the probability of  
 525 activation calculated as:

$$526 \quad P_a = k_{on} [Ca^{2+}]_i C^* \quad (10)$$

527 where  $P_a$  is the activation probability,  $k_{on}$  is the RyR “on” rate and  $C^*$  is the fraction of  
 528 RyR available to open.  $C^*$  is calculated from the expression:

$$529 \quad C^* = \frac{k_{on}}{k_{on} + 2k_{off}} \quad (11)$$

530 where  $k_{off}$  is the RyR “off” rate.

531 The effect of RyR clustering is described by:

$$532 \quad P_c = 1 - (1 - P_a)^{\beta_{PN}} \quad (12)$$

533 where  $P_c$  is the cluster activation probability and  $\beta_{PN}$  the number of RyRs in a cluster  
534 at the perinexus.

535  $Ca^{2+}$  spark amplitude is provided by the following equations:

$$536 \quad J_{spark} = \frac{\beta_{PN} I_{RyR}}{z_{Ca} F} \quad (13)$$

$$537 \quad [Ca^{2+}] = \frac{J_{spark}}{2\pi r_{PN} D_{sub}} \quad (14)$$

538 The probability of a  $Ca^{2+}$  spark propagating from an activated RyR cluster to the next  
539 cluster at distance  $r_{myo}$  is described by the following equations (54):

$$540 \quad [Ca^{2+}] = \frac{J_{spark}}{2\pi r_{myo} D_{cyto}} \quad (15)$$

$$541 \quad P_a = k_{on} [Ca^{2+}]_i C^* \quad (16)$$

$$542 \quad P_c = 1 - (1 - P_a)^{\beta_{myo}} \quad (17)$$

543

| Parameter                   | Definition                                             | Value                       | Reference  |
|-----------------------------|--------------------------------------------------------|-----------------------------|------------|
| <i>Cell geometry</i>        |                                                        |                             |            |
| R                           | Cell width                                             | 20.6 $\mu\text{m}$          | Experiment |
| L                           | Cell length                                            | 100.5 $\mu\text{m}$         |            |
| H                           | Cell height                                            | 14.2 $\mu\text{m}$          |            |
| S                           | Cell surface                                           | 7580 $\mu\text{m}^2$        | Estimate   |
| $C_m$                       | Membrane capacitance                                   | 2 $\mu\text{F}/\text{cm}^2$ | (31)       |
| $V_{cell}$                  | Cell volume                                            | 29.4 pL                     | Estimate   |
| $V_{acc}$                   | Cytoplasmic volume accessible by $Ca^{2+}$             | 10.6 pL                     |            |
| <i>Microdomain geometry</i> |                                                        |                             |            |
| $r_{PN}$                    | Thickness of the subsarcolemmal space at the perinexus | 9.8 nm                      | Experiment |
| $V_{dyad,PN}$               | Dyadic volume at the perinexus                         | 0.019 $\mu\text{m}^3$       | Estimate   |
| $r_{myo,trans}$             | Nearest RyR cluster edge distance transverse           | 0.56 $\mu\text{m}$          | Experiment |
| $r_{myo,long}$              | Nearest RyR cluster edge distance longitudinal         | 1.25 $\mu\text{m}$          |            |

|                                                      |                                                         |                                            |            |
|------------------------------------------------------|---------------------------------------------------------|--------------------------------------------|------------|
| $l_{\text{myo}}$                                     | Thickness of the dyad at the sarcomeres                 | 11.08 nm                                   |            |
| $V_{\text{dyad,myo}}$                                | Dyadic volume at the sarcomeres                         | 0.024 $\mu\text{m}^3$                      | Estimate   |
| <i>Ion concentrations and temperature</i>            |                                                         |                                            |            |
| $[\text{Na}^+]_i$                                    | Cytoplasmic $\text{Na}^+$ concentration                 | 10 mmol/L                                  | Experiment |
| $[\text{Na}^+]_o$                                    | External $\text{Na}^+$ concentration                    | 144.9 mmol/L                               |            |
| $[\text{K}^+]_i$                                     | Cytoplasmic $\text{K}^+$ concentration                  | 144 mmol/L                                 |            |
| $[\text{K}^+]_o$                                     | External $\text{K}^+$ concentration                     | 5.4 mmol/L                                 |            |
| $[\text{Ca}^{2+}]_o$                                 | External $\text{Ca}^{2+}$ concentration                 | 1 or 1.8 mmol/L                            |            |
| T                                                    | Temperature                                             | 310 K                                      |            |
| <i>Ca<sup>2+</sup> buffer concentrations</i>         |                                                         |                                            |            |
| $B_{\text{max,TC}}$                                  | Cytoplasmic concentration of Troponin C (Mg) buffer     | 140 $\mu\text{mol/L}$                      | (46)       |
| $B_{\text{max,SERCA}}$                               | Cytoplasmic concentration of SERCA buffer               | 47 $\mu\text{mol/L}$                       |            |
| $B_{\text{max,CALM}}$                                | Cytoplasmic concentration of Calmodulin buffer          | 24 $\mu\text{mol/L}$                       |            |
| $B_{\text{max,phosphoL}}$                            | Cytoplasmic concentration of phospholipid (low) buffer  | 42 $\mu\text{mol/L}$                       |            |
| $B_{\text{max,phosphoH}}$                            | Cytoplasmic concentration of phospholipid (high) buffer | 15 $\mu\text{mol/L}$                       |            |
| $B_{\text{max,myosin}}$                              | Cytoplasmic concentration of myosin buffer              | 140 $\mu\text{mol/L}$                      | Experiment |
| $B_{\text{max,ATP}}$                                 | Cytoplasmic concentration of ATP buffer                 | 5 mmol/L                                   |            |
| $B_{\text{max,FLUO}}$                                | Cytoplasmic concentration of Fluo-4 buffer              | 50 $\mu\text{mol/L}$                       |            |
| <i>Ca<sup>2+</sup> buffer dissociation constants</i> |                                                         |                                            |            |
| $K_{d,TC}$                                           | Dissociation constant for Troponin C (Mg) buffer        | 0.02 $\mu\text{mol/L}$                     | (46, 55)   |
| $K_{d,SERCA}$                                        | Dissociation constant for SERCA buffer                  | 0.6 $\mu\text{mol/L}$                      |            |
| $K_{d,CALM}$                                         | Dissociation constant for Calmodulin buffer             | 7 $\mu\text{mol/L}$                        |            |
| $K_{d,phosphoL}$                                     | Dissociation constant for phospholipid (low) buffer     | 13 $\mu\text{mol/L}$                       |            |
| $K_{d,phosphoH}$                                     | Dissociation constant for phospholipid (high) buffer    | 0.3 $\mu\text{mol/L}$                      |            |
| $K_{d,myosin}$                                       | Dissociation constant for myosin buffer                 | 4.62 $\mu\text{mol/L}$                     |            |
| $K_{d,ATP}$                                          | Dissociation constant for ATP buffer                    | 1200 $\mu\text{mol/L}$                     |            |
| $K_{d,FLUO}$                                         | Dissociation constant for Fluo-4 buffer                 | 0.739 $\mu\text{mol/L}$                    |            |
| <i>Ca<sup>2+</sup> diffusion constants</i>           |                                                         |                                            |            |
| $D_{\text{sub}}$                                     | Subsarcolemmal $\text{Ca}^{2+}$ diffusion constant      | $7.8 \cdot 10^{-10}$ $\text{m}^2/\text{s}$ | (55)       |
| $D_{\text{cyto}}$                                    | Cytoplasmic $\text{Ca}^{2+}$ diffusion constant         | $3.5 \cdot 10^{-10}$ $\text{m}^2/\text{s}$ | (56)       |
| <i>Cx43 hemichannel parameters</i>                   |                                                         |                                            |            |
| $I_{\text{Ca}}$                                      | Hemichannel mediated $\text{Ca}^{2+}$ current           | 0-3 pA                                     | Estimate   |
| $T_{o, HC}$                                          | Open time hemichannel                                   | 8.16 ms                                    | Experiment |



| <i>Na<sup>+</sup>/Ca<sup>2+</sup> exchanger parameters</i> |                                                          |                                                     |            |
|------------------------------------------------------------|----------------------------------------------------------|-----------------------------------------------------|------------|
| $g_{NCX}$                                                  | NCX conductance                                          | 52.5 $\mu\text{mol/L/ms}$                           | (49, 52)   |
| $K_{m,Cai}$                                                | Dissociation constant for intracellular $\text{Ca}^{2+}$ | 0.00359 mmol/L                                      |            |
| $K_{m,Cao}$                                                | Dissociation constant for extracellular $\text{Ca}^{2+}$ | 1.3 mmol/L                                          |            |
| $K_{m,Nai}$                                                | Dissociation constant for intracellular $\text{Na}^+$    | 12.3 mmol/L                                         |            |
| $K_{m,NaO}$                                                | Dissociation constant for extracellular $\text{Na}^+$    | 87.5 mmol/L                                         |            |
| $k_{sat}$                                                  | Maximal NCX turnover                                     | 0.27                                                |            |
| $n_{Hill}$                                                 | Hill coefficient                                         | 3                                                   |            |
| $K_{mCaAct}$                                               | $\text{Ca}^{2+}$ activation constant                     | 150 nmol/L                                          | (57)       |
| $\epsilon$                                                 | NCX voltage dependence coefficient                       | 0.35                                                |            |
| <i>Ryanodine receptor parameters</i>                       |                                                          |                                                     |            |
| $I_{RyR}$                                                  | RyR current                                              | 0.35 pA                                             | (53, 58)   |
| $k_{on}$                                                   | RyR on rate                                              | $1.25 \cdot 10^8 \text{ mol/L}^{-1} \text{ s}^{-1}$ |            |
| $k_{off}$                                                  | RyR off rate                                             | $75 \text{ s}^{-1}$                                 |            |
| $\beta_{PN}$                                               | Number of RyRs in supercluster at perinexus              | 155                                                 | Experiment |
| $\beta_{myo}$                                              | Number of RyRs in supercluster at the sarcomeres         | 111                                                 |            |

544 **Supplemental Table 5.** *Modeling parameters, experimental values are obtained in*  
545 *mouse*  
546

### 547 **Monophasic action potential recording**

548 Left ventricular (LV) tissue wedges (2-5 cm<sup>2</sup>) were prepared by cannulating a distal LV  
549 coronary artery and dissecting its perfusing territory, any arterial leaks were sutured.  
550 The wedge was then mounted in a modified Langendorff-perfusion system and  
551 perfused with oxygenated Tyrode's solution at  $37 \pm 1^\circ\text{C}$  with a constant flow rate of ~5  
552 mL/min. The wedge was fully submerged in an oxygenated Tyrode's-filled chamber  
553 maintained at  $37 \pm 1^\circ\text{C}$ . Modified silver chloride bipolar electrodes (0.5 mm diameter),  
554 positioned transmurally at the edges of the LV wedge, were used to record a pseudo-  
555 electrocardiogram (ECG). A standard 2 mm quadripolar electrophysiology (EP)  
556 catheter (Biosense Webster, Belgium) was positioned on the endocardial surface of  
557 the wedge for pacing. A monophasic action potential (MAP) catheter (MedFact

558 Engineering GmbH, Germany) was used to record the MAPs from the mid-myocardial  
559 layer of the LV wedge. All signals were filtered between 0.01 Hz - 1 kHz, digitized at 4  
560 kHz and recorded using a LABSYSTEM PRO EP recording system (Boston Scientific,  
561 USA). All recordings were only performed after a stabilization period of 10-20 minutes,  
562 when the LV wedges were quiescent.

563

564 Baseline MAPs and ECG were recorded for 5 minutes with endocardial pacing at 1 Hz  
565 by a square pulse of 2-5 ms and intensity adjusted according to supra-capture  
566 threshold 2-10 V. A conditioning 2 minutes pacing train at 1 Hz and 2 Hz was then  
567 applied, followed by a rest 'diastolic' phase for 1 minute to observe spontaneous  
568 activity. Thereafter, pharmacological intervention (TAT-Gap19 80  $\mu\text{mol/L}$ ) or vehicle  
569 were added to the perfusing Tyrode's solution for 10 minutes while pacing at 1 Hz.  
570 Then isoproterenol (ISO) 100 nmol/L was added to the perfusate, and the conditioning  
571 1 Hz and 2 Hz pacing protocol was repeated for 2 minutes, with 1 minute diastolic rest  
572 thereafter to observe spontaneous activity.

573

#### 574 **Statistical analysis**

575 Data are expressed as mean  $\pm$  standard error of the mean (SEM) unless otherwise  
576 indicated, with 'n' denoting the number of cells and 'N' denoting the number of  
577 independent experiments. Following outlier analysis (mean  $\pm$  3xSD), normality of  
578 distribution was tested and appropriate statistical test was determined for  
579 comparative statistics. Data were compared using a nested design taking into  
580 account n cells and N animals or N human hearts. A two-tailed P value  $< 0.05$  was  
581 considered as indicating statistical significance. In the graphs, the actual P values are

582 provided. Statistical analysis and graphical data representation was done with  
583 Graphpad Prism (v.9).

584 **Supplemental Tables**

| <b>Unitary current properties (mean ± SEM)</b> |                |                  |
|------------------------------------------------|----------------|------------------|
| <i>Parameter</i>                               | <i>Mouse</i>   | <i>Pig</i>       |
| N <sub>hearts</sub>                            | 90             | 20               |
| n <sub>cells</sub>                             | 281            | 55               |
| Total number of events                         | 9038           | 503              |
| Event probability                              | 0.051 ± 0.003  | 0.013 ± 0.003*** |
| Number of events per cell                      | 32.19 ± 2.88   | 3.47 ± 0.44***   |
| Availability (%)                               | 96.09          | 60               |
| Active event probability                       | 0.053 ± 0.003  | 0.021 ± 0.005**  |
| Number of events per active cell               | 38.22 ± 5.35   | 6.31 ± 1.08      |
| γ (pS)                                         | 227.25 ± 6.69  | 233.83 ± 2.36    |
| γ <sub>sub</sub> (pS)                          | 105.81 ± 1.65  | 105.45 ± 3.51    |
| Level 2 conductance (pS)                       | 417.62 ± 32.81 | 442.46 ± 2.87    |
| Level 3 conductance (pS)                       | 620.43 ± 22.43 |                  |
| Level 4 conductance (pS)                       | 841.09 ± 10.05 |                  |
| Slope γ (pS)                                   | 217.1 ± 7.49   | 219.6 ± 9.15     |
| T <sub>first latency</sub> (ms)                | 94.95 ± 5      | 85.48 ± 10       |
| T <sub>open</sub> (ms)                         | 8.16 ± 0.08    | 8.21 ± 0.35      |

585 **Supplemental Table 6.** Caffeine-provoked channel properties in mouse and pig left  
 586 ventricular cardiomyocytes at -70 mV (excluding slope conductance) and 37°C. γ =  
 587 unitary conductance, τ = time constant. Data are presented as mean ± SEM.  
 588 Significant interspecies differences are indicated with \*.  
 589

| <b>Single-channel properties (mean ± SEM or range)</b> |                                 |                   |
|--------------------------------------------------------|---------------------------------|-------------------|
| <i>Parameter</i>                                       | <i>Macropatch (cell end/ID)</i> | <i>SICM-patch</i> |
| N <sub>hearts</sub>                                    | 20                              | 5                 |
| n <sub>patches</sub>                                   | 80/80                           | 35                |
| Availability (%)                                       | 32/33                           | 12                |
| Total number of events                                 | 370/500                         | 32                |
| P <sub>o</sub> (x 10 <sup>-3</sup> )                   | 0.62 ± 0.42/1.75 ± 0.47         | 0.25 ± 0.8        |
| Number of channels per active patch                    | 1-2/1-2                         | 1-2               |
| γ (pS)                                                 | 207.45 ± 1.26/210.1 ± 0.36      | 221.29 ± 1.05     |
| γ <sub>sub</sub> (pS)                                  | 121.46 ± 3.43/114.92 ± 0.54     | 113.29 ± 1.71     |
| Level 2 conductance (pS)                               | 423.13 ± 13.95/410.33 ± 2.11    | 442.46 ± 2.87     |
| Slope γ (pS)                                           | 217.6 ± 4.41/218.2 ± 8.71       |                   |
| T <sub>open</sub> (ms)                                 | 10.19 ± 0.1/15.8 ± 0.5          | 7.21 ± 0.75       |
| Estimated number of channels per cell                  | 82                              | 204               |

590 **Supplemental Table 7.** Caffeine-provoked single-channel properties in mouse left  
 591 ventricular cardiomyocytes during macropatch and SICM-patch recording at -70 mV  
 592 (excluding slop conductance) and 37°C. P<sub>o</sub> = open probability, γ = unitary  
 593 conductance, τ = time constant. Data are presented as mean ± SEM (including  
 594 ranges where applicable).  
 595  
 596  
 597

| <i>Parameter</i>      | <b>HF Group</b>                                                                                                                                                                                                                                                                                                                                                                                  |
|-----------------------|--------------------------------------------------------------------------------------------------------------------------------------------------------------------------------------------------------------------------------------------------------------------------------------------------------------------------------------------------------------------------------------------------|
| Diagnosis (N)         | 6 ICM, 8 DCM                                                                                                                                                                                                                                                                                                                                                                                     |
| Age (years)           | 51.92 ± 15.44                                                                                                                                                                                                                                                                                                                                                                                    |
| Gender                | 8 Male, 6 Female                                                                                                                                                                                                                                                                                                                                                                                 |
| BMI                   | 26.94 ± 5.19                                                                                                                                                                                                                                                                                                                                                                                     |
| LVEF (%)              | 21.57 ± 12.06                                                                                                                                                                                                                                                                                                                                                                                    |
| IVSd (mm)             | 11.32 ± 7.68                                                                                                                                                                                                                                                                                                                                                                                     |
| LVPWd (mm)            | 12.14 ± 9.79                                                                                                                                                                                                                                                                                                                                                                                     |
| LVIDd (mm)            | 58.87 ± 15.14                                                                                                                                                                                                                                                                                                                                                                                    |
| LVIDs (mm)            | 49.83 ± 14.64                                                                                                                                                                                                                                                                                                                                                                                    |
| NT-pro-BNP (ng/L)     | 3272.71 ± 3396.1                                                                                                                                                                                                                                                                                                                                                                                 |
| Device (N)            | 7 ICD, 4 CRT-D, 6 LVAD (Heartware, Heartmate II)                                                                                                                                                                                                                                                                                                                                                 |
| Medication (N)        | Platelet inhibitors/anticoagulation (14)<br>β-blocker (13)<br>ACE-inhibitor/ATII receptor blocker (11)<br>Diuretics (9)<br>PPI (9)<br>Hormonal therapy (5)<br>Psychotropic drugs (4)<br>Statin (4)<br>Anti-arrhythmic drugs (3)<br>Antibiotics (2)<br>Vasodilator (2)<br>Metformin and other oral antidiabetics (2)<br>Digoxin (2)<br>Corticosteroids (1)<br>Dietary supplements (e.g. iron) (1) |
|                       | <b>NF group</b>                                                                                                                                                                                                                                                                                                                                                                                  |
| Age (years)           | 65.88 ± 11.98                                                                                                                                                                                                                                                                                                                                                                                    |
| Gender                | 14 Male, 12 Female                                                                                                                                                                                                                                                                                                                                                                               |
| BMI                   | 25.88 ± 5.29                                                                                                                                                                                                                                                                                                                                                                                     |
| Heart frequency (bpm) | 78.95 ± 21.14                                                                                                                                                                                                                                                                                                                                                                                    |
| SBP (mm Hg)           | 124.25 ± 20.91                                                                                                                                                                                                                                                                                                                                                                                   |
| DBP (mm Hg)           | 61.83 ± 13.18                                                                                                                                                                                                                                                                                                                                                                                    |
| Medication (N)        | Vasopressors (18)<br>Antibiotics (13)<br>Corticosteroids (12)<br>Desmopressin (8)<br>Platelet inhibitors/anticoagulation (7)<br>PPI (4)<br>Vitamin supplements (4)<br>Psychotropic drugs (4)<br>ACE-inhibitor/ATII receptor blocker (3)<br>α1-blocker (2)<br>Anticonvulsants (2)<br>β-blocker (2)<br>Diuretics (2)<br>Statins (2)<br>Hormonal therapy (2)                                        |

|                                       |                                                                                                   |
|---------------------------------------|---------------------------------------------------------------------------------------------------|
|                                       | Insulin (2)<br>Statin (2)<br>Nitrates (1)<br>Ca <sup>2+</sup> antagonist (1)<br>H1-antagonist (1) |
| ECG (when available)                  | Normal sinus rhythm (7)<br>Sinus tachycardia (1)                                                  |
| Echocardiography (when available)     | Normal LV and RV structure and function, no<br>significant valvular disease (8)                   |
| Coronary angiography (when available) | No significant coronary artery disease (3)                                                        |

598 **Supplemental Table 8.** Patient characteristics. Data expressed as categorical or  
 599 continuous (mean ± SD) variables.  
 600

**Supplemental Figures**

**A**

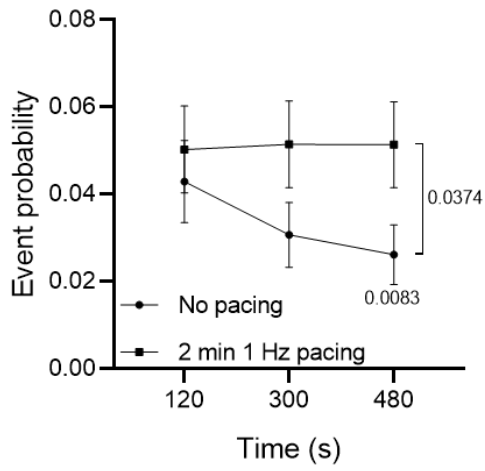

**B**

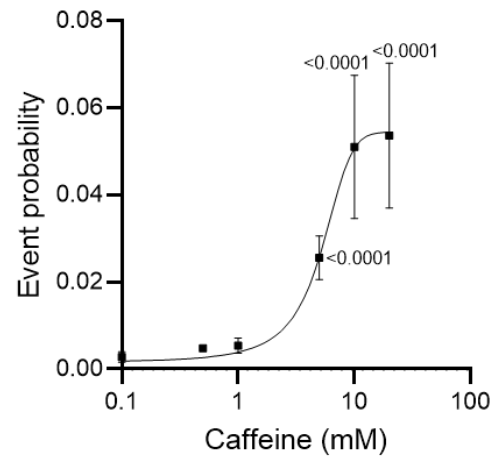

**C**

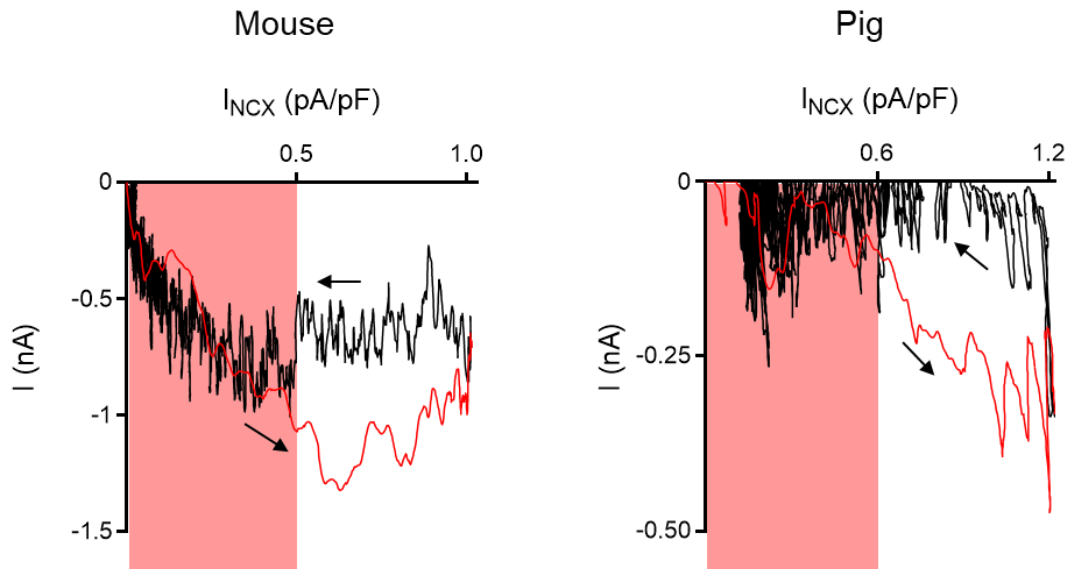

**D**

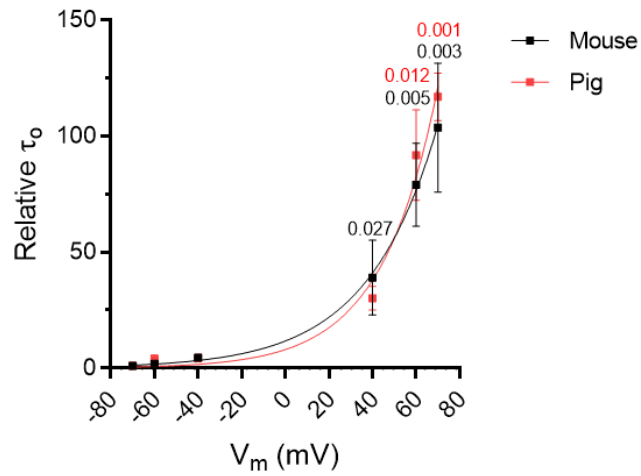

604 **Supplemental Figure 2. Caffeine-induced Ca<sup>2+</sup> release from the sarcoplasmic**  
605 **reticulum activates Cx43 hemichannels at resting membrane potentials:**  
606 **additional validation and electrophysiological analysis.**

607 (A) Exposure to a 2 min pacing period at 1 Hz prevents channel rundown during the  
608 recording. Summary dot plot showing unitary current event probability during 3  
609 caffeine applications (10 mM, 8 seconds) separated by 2 minutes of voltage clamp at  
610 resting membrane potential (dots) or pacing at 1 Hz (squares). Data obtained in  
611 freshly single mouse left ventricular cardiomyocytes (nested one-way ANOVA; N/n =  
612 5/25).

613 (B) Caffeine dose-response curve showing caffeine-induced unitary current event  
614 probability (EC<sub>50</sub> = 5.08 mmol/L). Data obtained in freshly single mouse left  
615 ventricular cardiomyocytes (N/n = 5/19). P-values compare to 0.1 mM caffeine  
616 (nested one-way ANOVA).

617 (C) Phase-plane plots of ensemble Cx43 hemichannel current vs NCX current (as  
618 measure of local, subsarcolemmal Ca<sup>2+</sup>). Red indicates good correlation between  
619 hemichannel current and subsarcolemmal Ca<sup>2+</sup> changes (N/n<sub>mouse</sub> = 90/281, N/n<sub>pig</sub> =  
620 20/55).

621 (D) Membrane depolarization significantly increases hemichannel open duration.  
622 Data obtained in single mouse and pig left ventricular cardiomyocytes (N/n<sub>mouse</sub> =  
623 5/20, N/n<sub>pig</sub> = 5/15). P-values compare to -70 mV (nested one-way ANOVA).



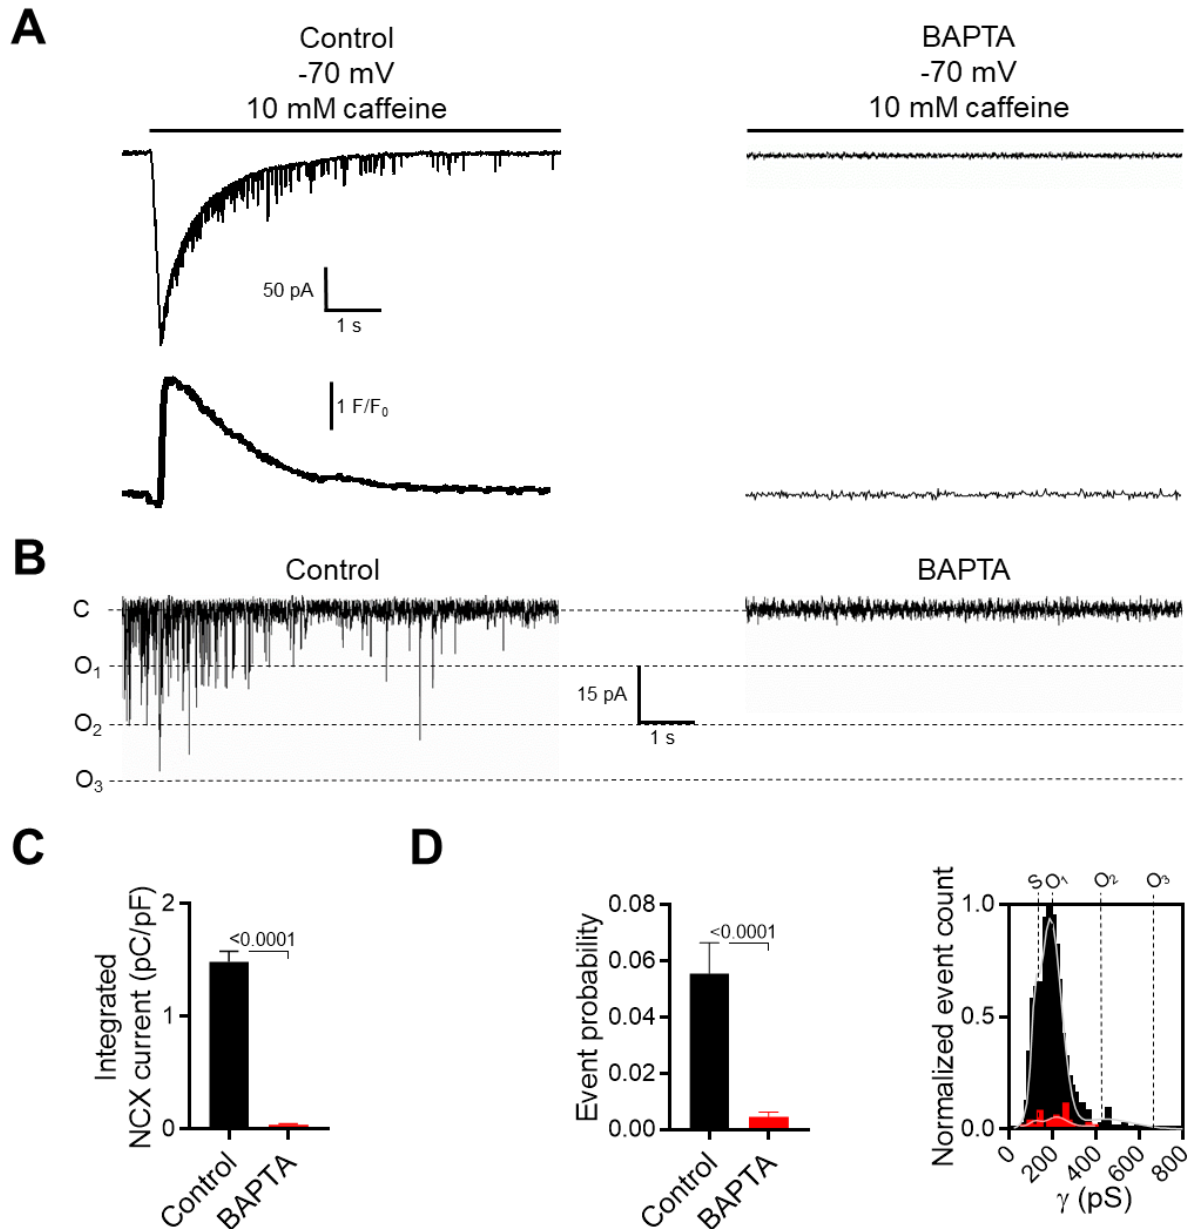

624  
625  
626  
627  
628  
629  
630  
631  
632  
633  
634  
635  
636  
637

**Supplemental Figure 3. Ca<sup>2+</sup> release induced unitary currents are abolished by BAPTA.**

(A) Example traces illustrating current and fluorescence signals during 10 mM caffeine application in single mouse cardiomyocytes voltage clamped at -70 mV during control conditions and when 10 mM BAPTA was included in the pipette.

(B) Unitary current example traces in control and in the presence of BAPTA (NCX currents subtracted).

(C) Summary graph indicating significantly reduced SR Ca<sup>2+</sup> content when BAPTA was present as compared to control (nested t-test; N/n<sub>mouse</sub> = 5/13).

(D) Summary bar chart and transition histogram showing significantly reduced unitary current event probability when BAPTA was present as compared to control (nested t-test; N/n<sub>mouse</sub> = 5/13).



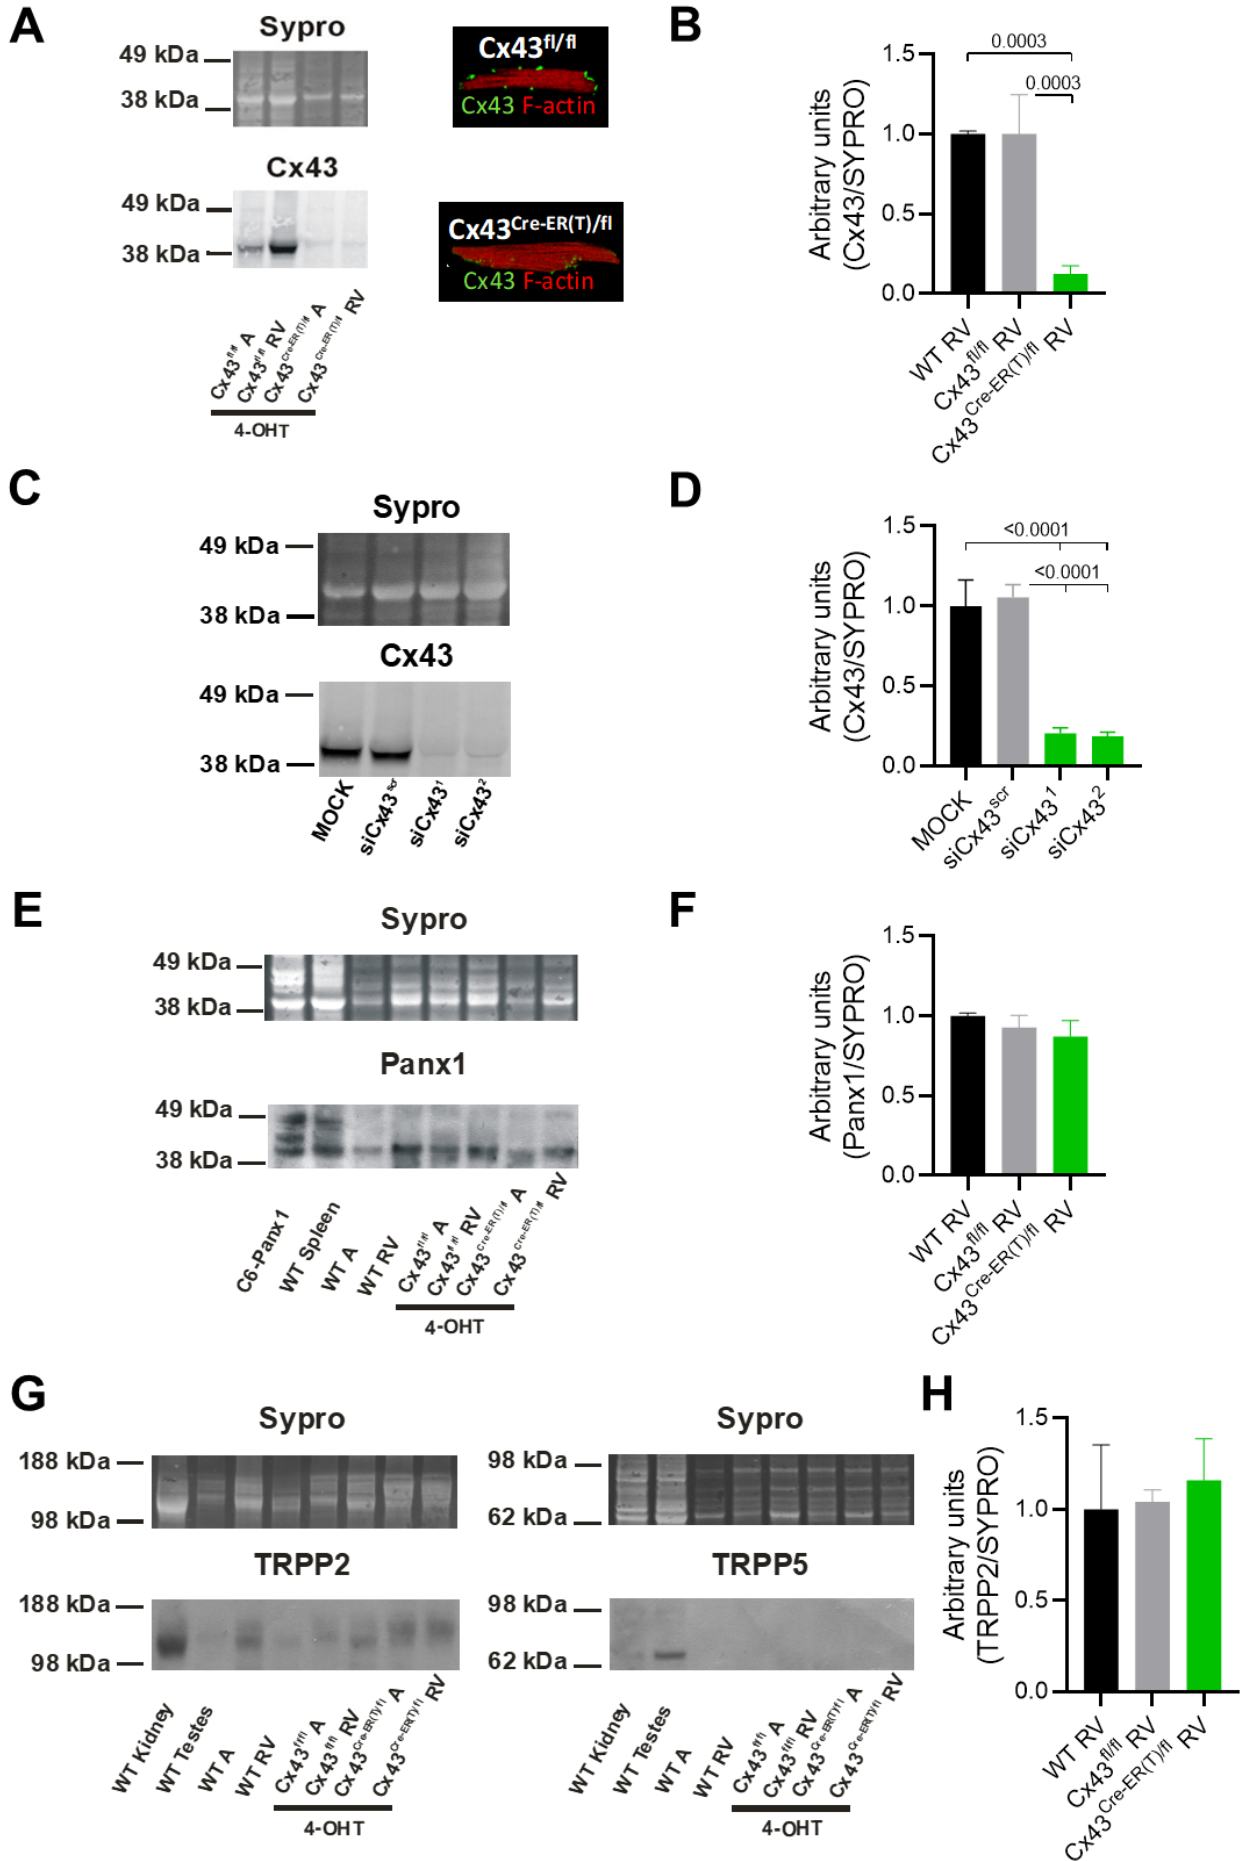

644 **Supplemental Figure 5. Validation of genetic tools.**

645 (A) Left, western blot of Cx43 protein levels in atrial and ventricular samples isolated  
646 from tamoxifen treated Cx43<sup>fl/fl</sup> and Cx43<sup>Cre-ER(T)/fl</sup> mice. Total protein quantification  
647 using SYPRO stain was used as loading control for relative quantification. Right,  
648 confocal micrographs of single mouse left ventricular cardiomyocytes double stained  
649 for Cx43 (green) and F-actin (red).

650 (B) Quantification of Cx43 protein levels relative to SYPRO stain (N = 5-8 per  
651 condition, 3 technical repeats, nested one-way ANOVA).

652 (C) Western blot of Cx43 protein levels in cultured single left ventricular pig  
653 cardiomyocytes MOCK transfected or transfected with (scrambled) Cx43 siRNA.

654 (D) Quantification of Cx43 protein levels relative to SYPRO stain (N = 5 per condition,  
655 3 technical repeats, nested one-way ANOVA).

656 (E) Western blot of Panx1 protein levels in atrial and ventricular samples isolated  
657 from wild type, tamoxifen treated Cx43<sup>fl/fl</sup> and Cx43<sup>Cre-ER(T)/fl</sup> mice. C6-Panx1 cells and  
658 mouse spleen were used as positive controls.

659 (F) Quantification of Panx1 protein levels relative to SYPRO stain (N = 5 per  
660 condition, 3 technical repeats, nested one-way ANOVA).

661 (G) Western blots of TRPP2 (left) and TRPP5 (right) protein levels in atrial and  
662 ventricular samples isolated from wild type, tamoxifen treated Cx43<sup>fl/fl</sup> and Cx43<sup>Cre-  
663 ER(T)/fl</sup> mice. Mouse kidney and testes were used as positive controls.

664 (H) Quantification of TRPP2 protein levels relative to SYPRO stain (N = 5 per  
665 condition, 3 technical repeats, nested one-way ANOVA).

**A**

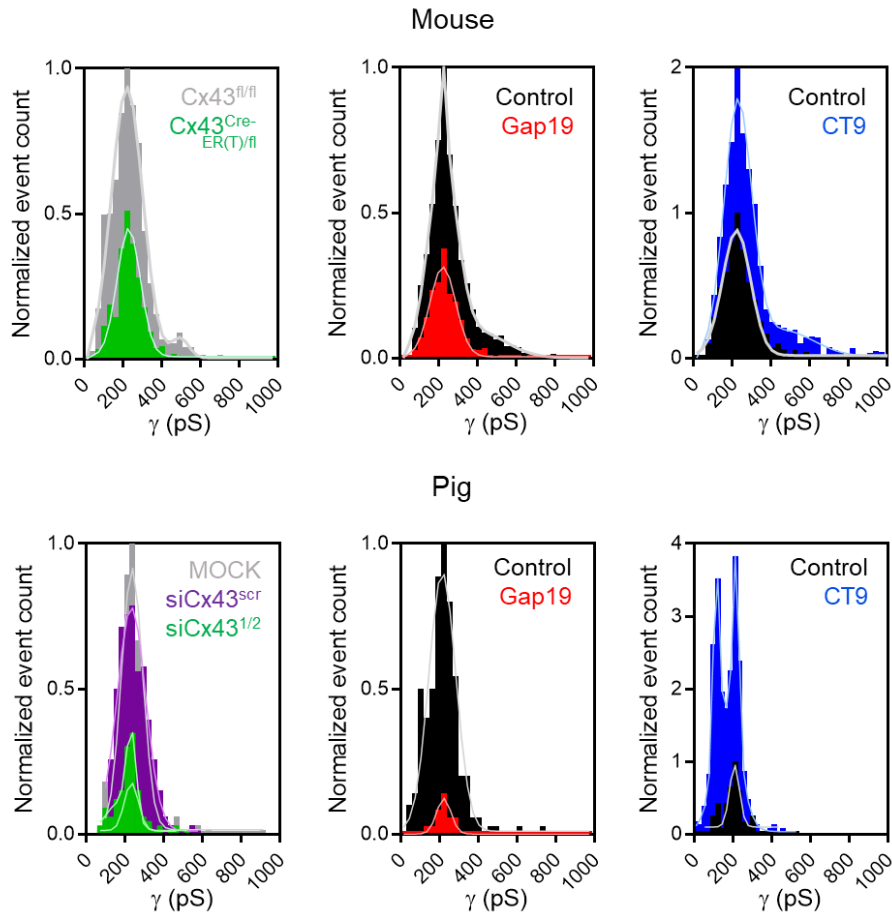

**B**

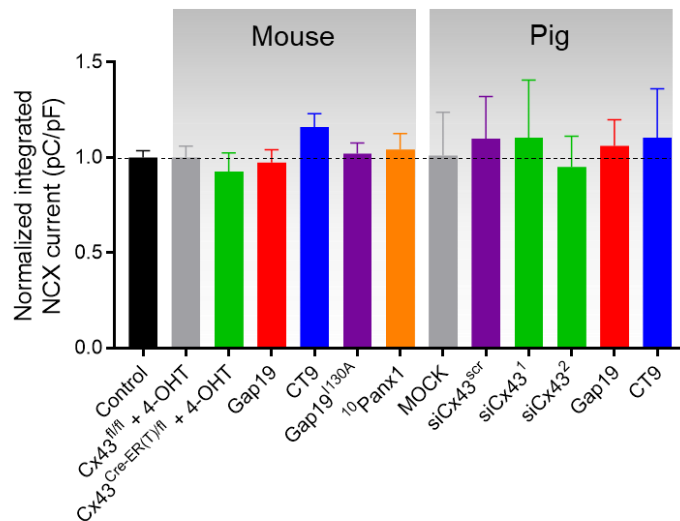

666  
667  
668  
669  
670  
671  
672  
673  
674

**Supplemental Figure 6. Validation of peptide toolkit.**

(A) Transition histograms illustrating ~220 pS caffeine-induced unitary current activities in mouse and pig single left ventricular cardiomyocytes. Statistically significant interventions and their respective control conditions from Figure 11 are shown (N/n<sub>mouse</sub> = 5-16/20-49 per condition, N/n<sub>pig</sub> = 5-6/15-21 per condition).

(B) Summary bar chart showing SR Ca<sup>2+</sup> content as measured by integrating caffeine-induced NCX current (N/n<sub>mouse</sub> = 5-16/20-49 per condition, N/n<sub>pig</sub> = 5-6/15-21 per condition; nested one-way ANOVA).

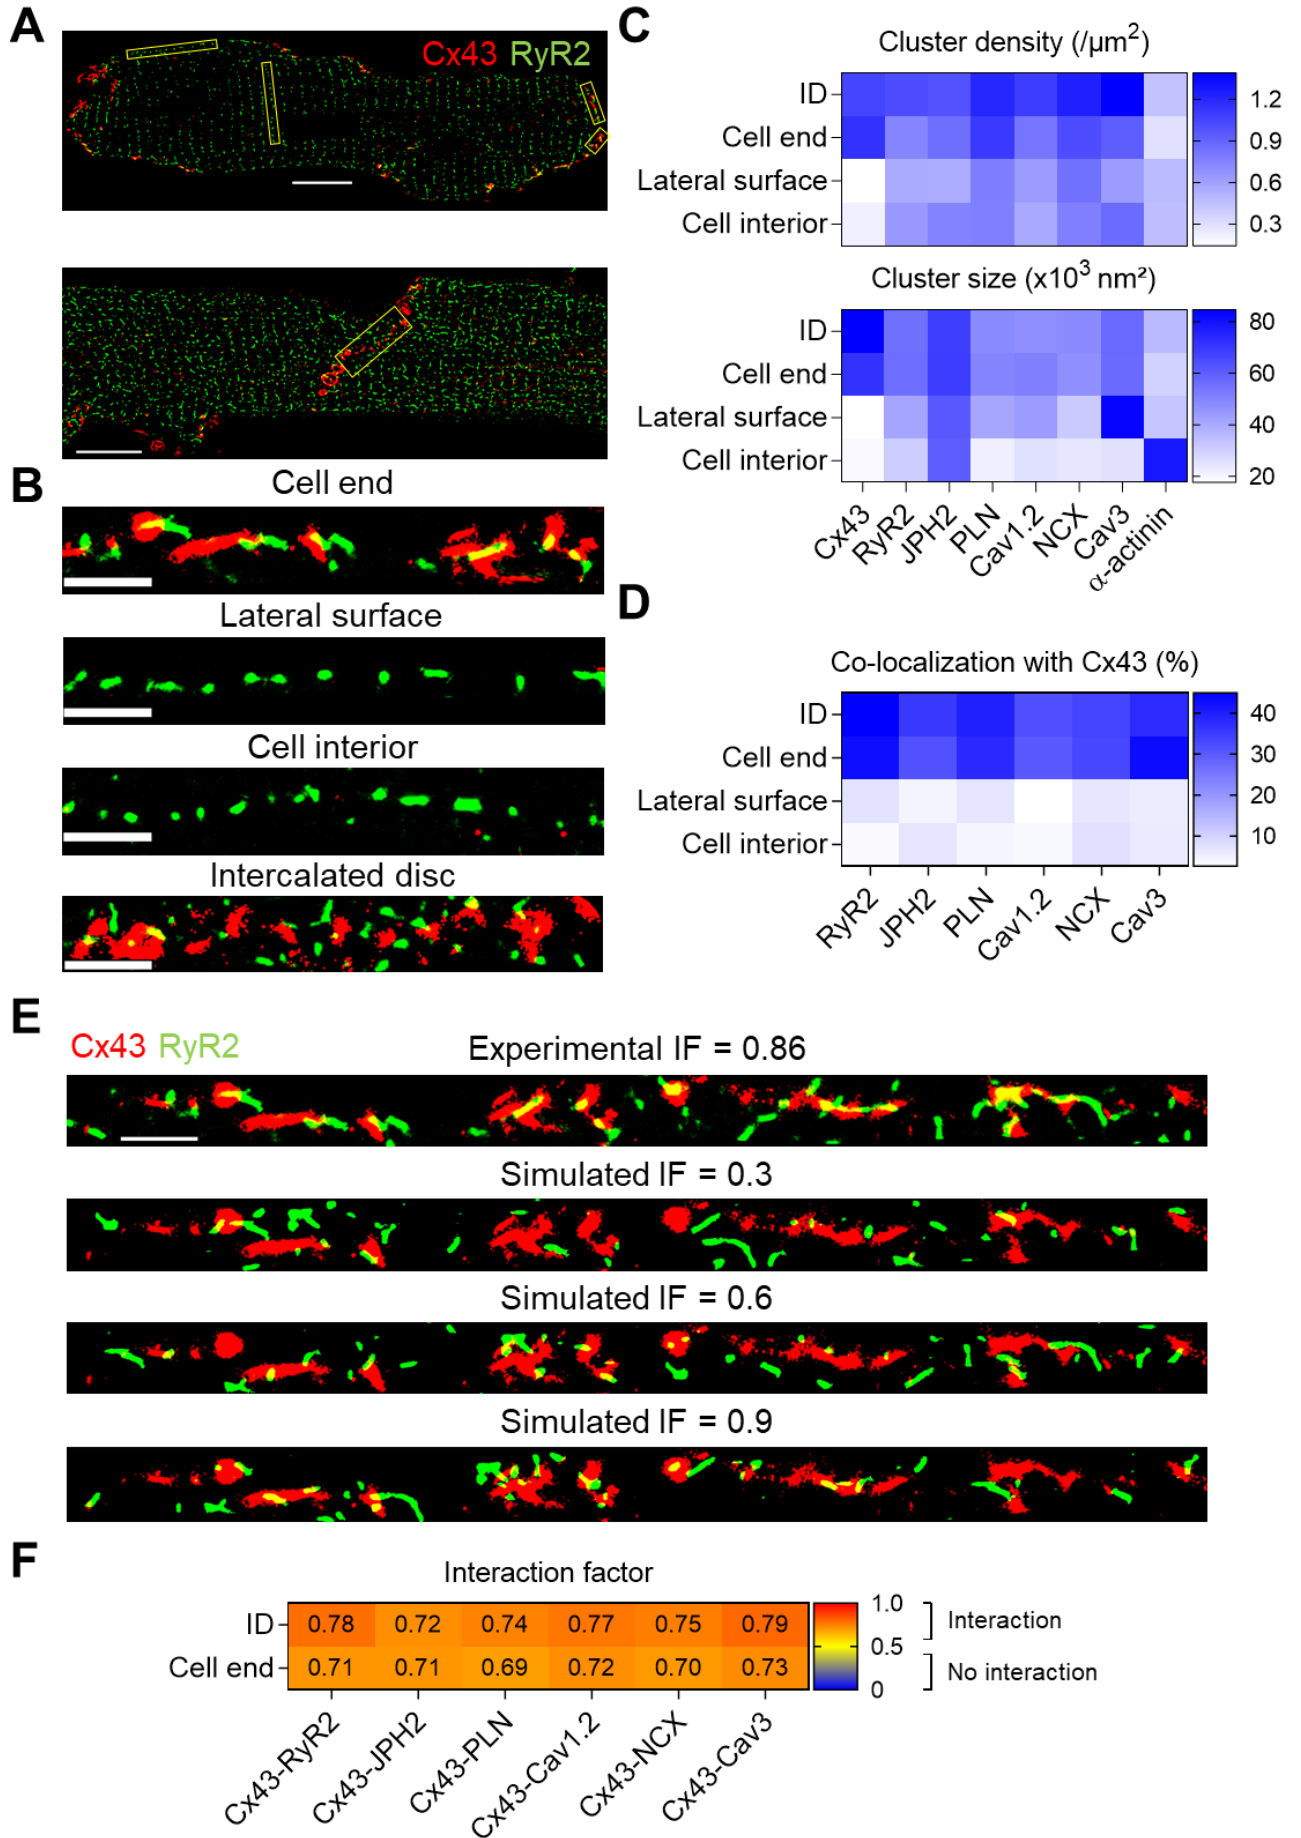

676 **Supplemental Figure 7. Robust association of Cx43 with molecular**  
677 **components of cardiac dyads and excitation-contraction coupling at the cell**  
678 **ends of single cardiomyocytes and intercalated disc of cardiomyocyte cell**  
679 **pairs.**

680 (A) Example 2D SMLM images double labeled for Cx43 (red) and RyR2 (green). Top,  
681 image of a single left ventricular mouse cardiomyocyte. Bottom, image of a  
682 cardiomyocyte cell pair. Scale bars = 10  $\mu\text{m}$ .

683 (B) Straightened region of interests (from yellow boxes in A) of Cx43 and RyR2 at  
684 different subcellular domains. Scale bar = 2  $\mu\text{m}$ .

685 (C) and (D) Mean cluster density, cluster size and colocalization with Cx43 heat  
686 maps at different subcellular regions of all tested markers in double stainings (Cx43-  
687 X, N/n = 3-5/17-79 per condition)).

688 (E) Experimental and simulated interaction factors (IFs) from a region of interest at  
689 the cell end of a single mouse ventricular cardiomyocyte. Scale bar = 2  $\mu\text{m}$ .

690 (F) Mean interaction factor heat map depicting the likelihood of co-localization with  
691 Cx43 (N/n = 3-5/17-79 per condition). Interaction factor > 0.6 indicates that co-  
692 localization is deterministic rather than random.

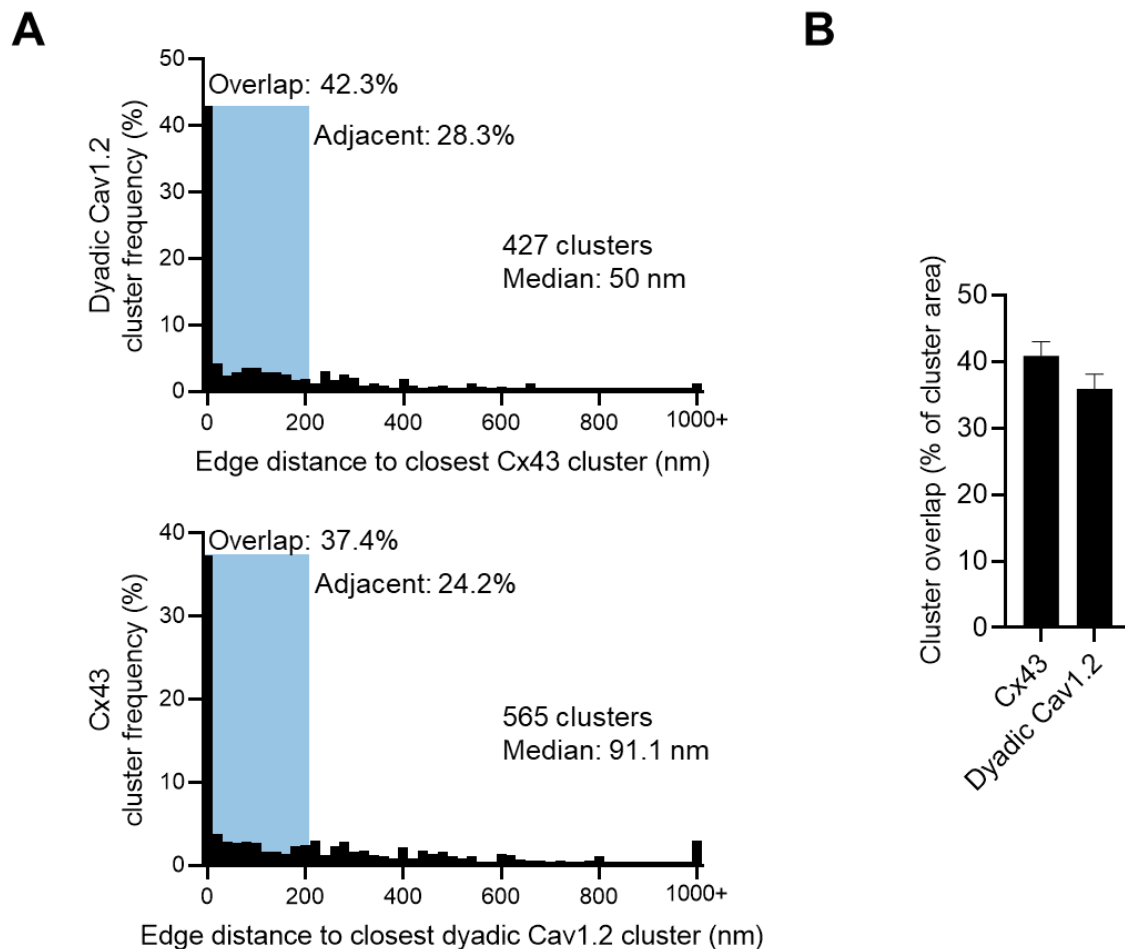

694

695 **Supplemental Figure 8. Relative localization analysis of 2D triple-color SMLM**  
 696 **images obtained in mouse left ventricular cardiomyocyte cell pairs.**  
 697 (A) Summary histograms of edge distances between Cx43 and dyadic Cav1.2 (as  
 698 determined by edge distance < 250 nm of RyR2 cluster) clusters (N/n = 5/16).  
 699 Summation of overlapping (edge distance < 20 nm) and adjacent (edge distance 20-  
 700 200 nm) clusters yields the perinexal fraction. Clusters > 200 nm yield the distant  
 701 fraction.  
 702 (B) Summary graph of the degree of cluster overlap (N/n = 5/16).



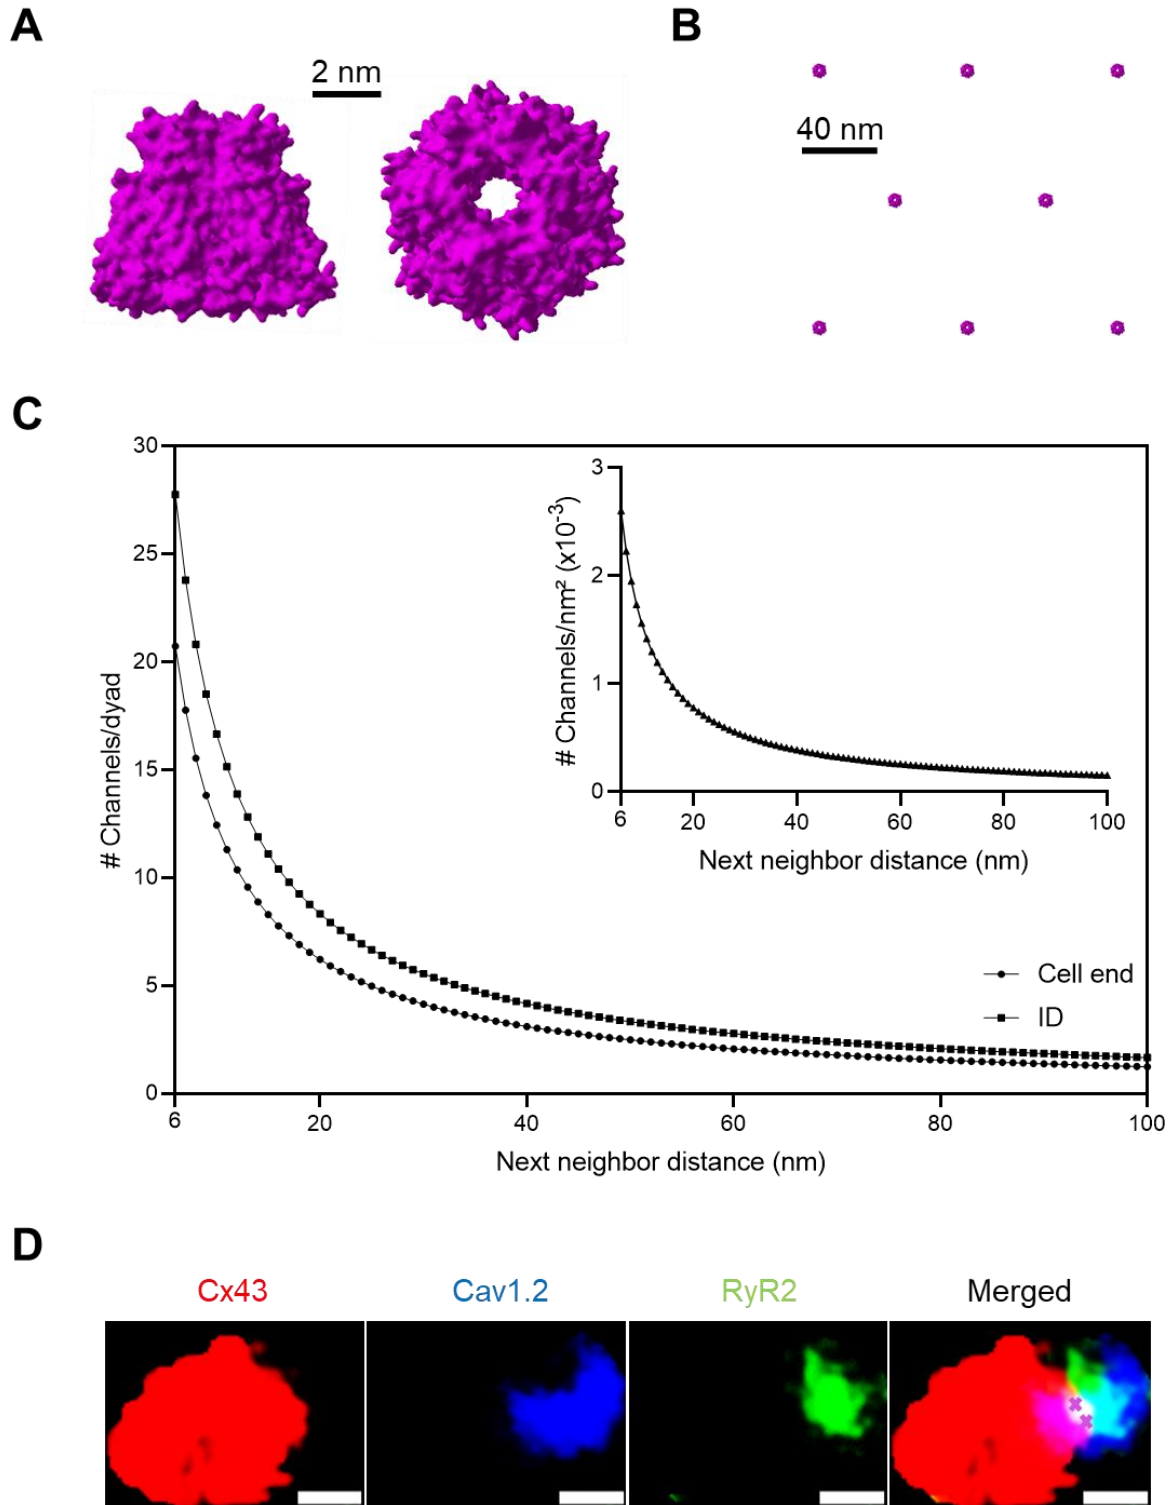

703

704 **Supplemental Figure 9. Estimation of Cx43 hemichannels per dyad using**  
 705 **molecular modeling.**

706 (A) 3D rendering of Cx43 hexamer generated based on monomeric murine Cx43  
 707 structure using SWISS-MODEL and SymmDock.

708 (B) Hexagonal array of Cx43 hexamers.

709 (C) Plots representing number of Cx43 hexamers per dyad as a function of next  
 710 neighbor distance. Gap junctional studies using freeze fracture electron microscopy  
 711 suggest a next neighbor distance of 8-10 nm between Cx43 gap junctions. In

712 addition, studies of the perinexus suggested that density of Cx43 hemichannels is 10  
713 times lower than the density of gap junctions in plaques. As such, number of Cx43  
714 hemichannels per dyad at the cell end of single cardiomyocytes or at the intercalated  
715 disc of cardiomyocyte cell pairs is suggested to be ~2.

716 (D) Particle averaged Cx43, Cav1.2 and RyR2 clusters. Purple crosses indicate  
717 position of Cx43 hemichannels suggested by protein modeling. Scale bar = 250 nm.

718

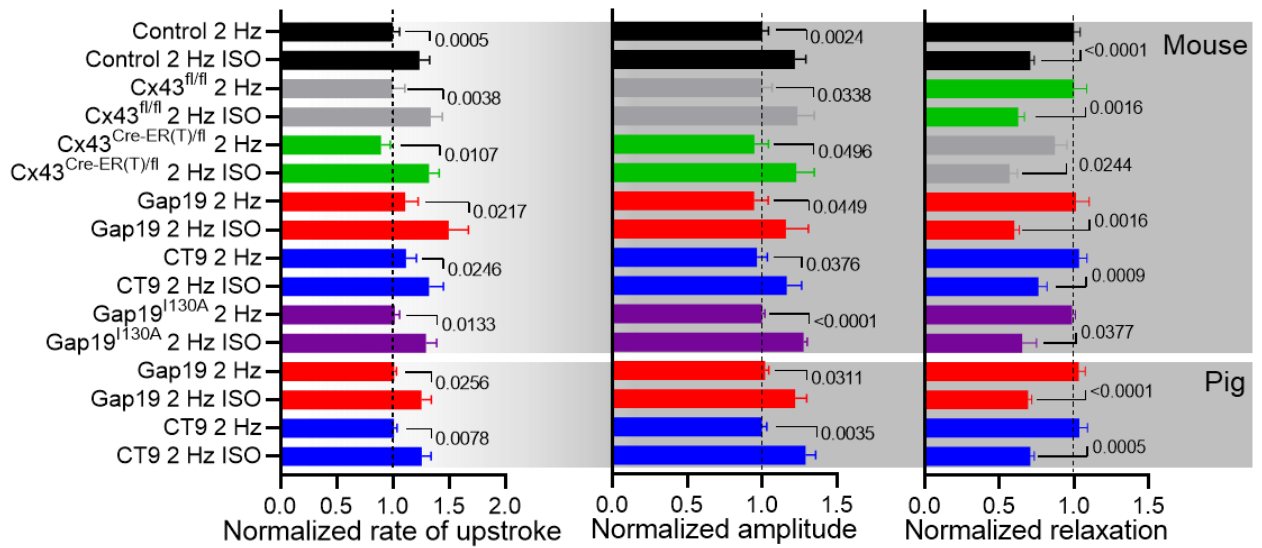

719

720 **Supplemental Figure 10. Effects of Cx43 targeting peptides and Cx43**  
 721 **knockdown on global Ca<sup>2+</sup> handling.**

722 Ca<sup>2+</sup> transient kinetics at 2 Hz pacing ± ISO and effects of Gap19, CT9 and Cx43  
 723 knockdown (nested one-way ANOVA; N/n<sub>mouse</sub> = 5-11/15-24 per condition, N/n<sub>pig</sub> =  
 724 5/15 per condition).  
 725

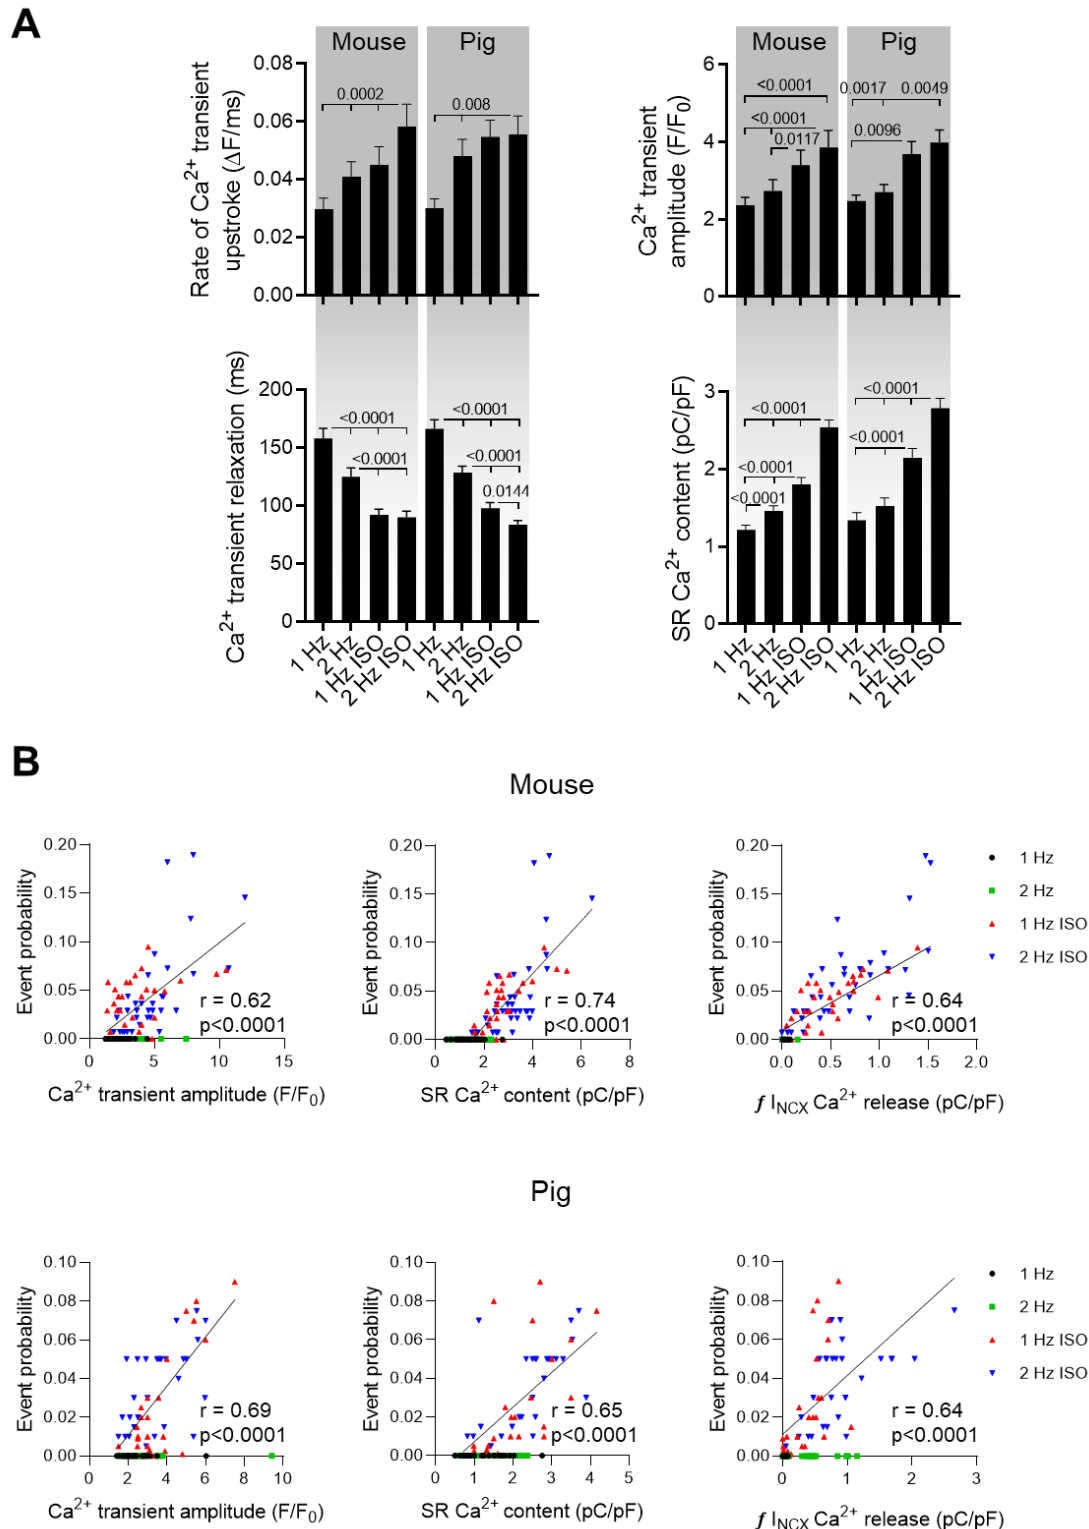

726

727

728

729

730

731

732

733

**Supplemental Figure 11. Changes in global Ca<sup>2+</sup> handling with adrenergic stimulation and relation to unitary current activity.**

(A) Summary bar charts showing increased global Ca<sup>2+</sup> handling upon adrenergic stimulation (nested one-way ANOVA; N/n<sub>mouse</sub> = 23/75, N/n<sub>pig</sub> = 10/30).

(B) Dot plots illustrating strong correlation between unitary current events during spontaneous Ca<sup>2+</sup> release and increased intracellular Ca<sup>2+</sup> during adrenergic stimulation (N/n<sub>mouse</sub> = 23/75, N/n<sub>pig</sub> = 10/30).

**A**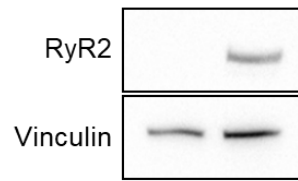

HEK RyR2  
HEK RyR2 + Tetracycline

**B**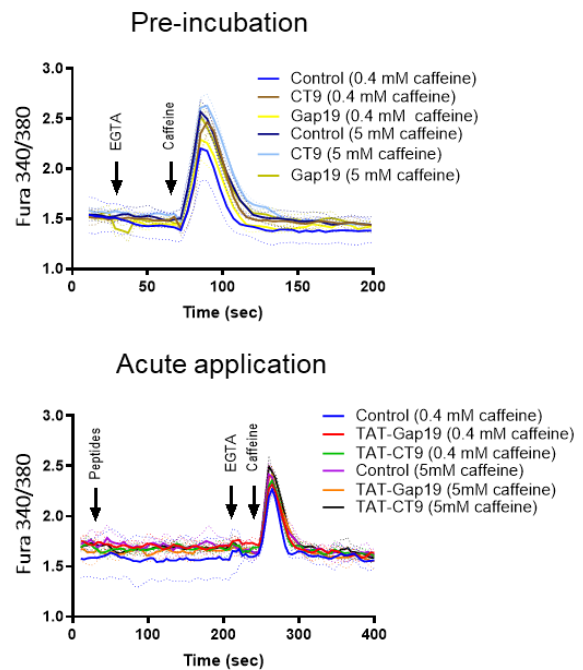**C**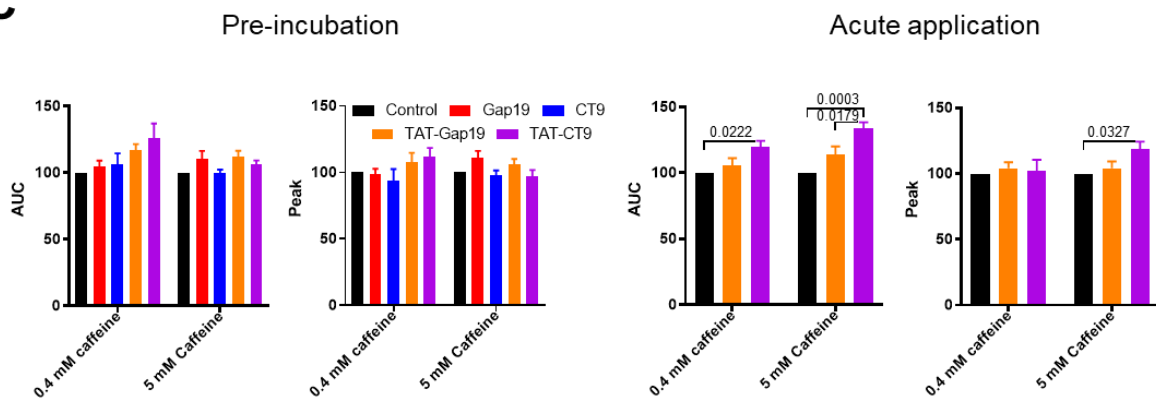

734

735 **Supplemental Figure 12. Control experiments testing the effect of Cx43**  
 736 **targeting peptides on RyR2 provoked  $Ca^{2+}$  changes.**

737 (A) Western blotting showing RyR2 protein expression in HEK RyR2 cell lysates  
 738 before and after tetracycline exposure. Vinculin was used as loading control.

739 (B) Averaged ( $\pm$  SEM) caffeine-induced  $Ca^{2+}$  transients under control conditions or  
 740 following pre-incubation or acute exposure of peptides in HEK cells overexpressing  
 741 RyR2 (N = 5).

742 (C) Summary bar charts of caffeine-induced  $Ca^{2+}$  transient integration (AUC) and  
 743 peak under control conditions, and following pre-incubation or acute exposure of  
 744 peptides in HEK cells overexpressing RyR2 (one-way ANOVA; N = 5).

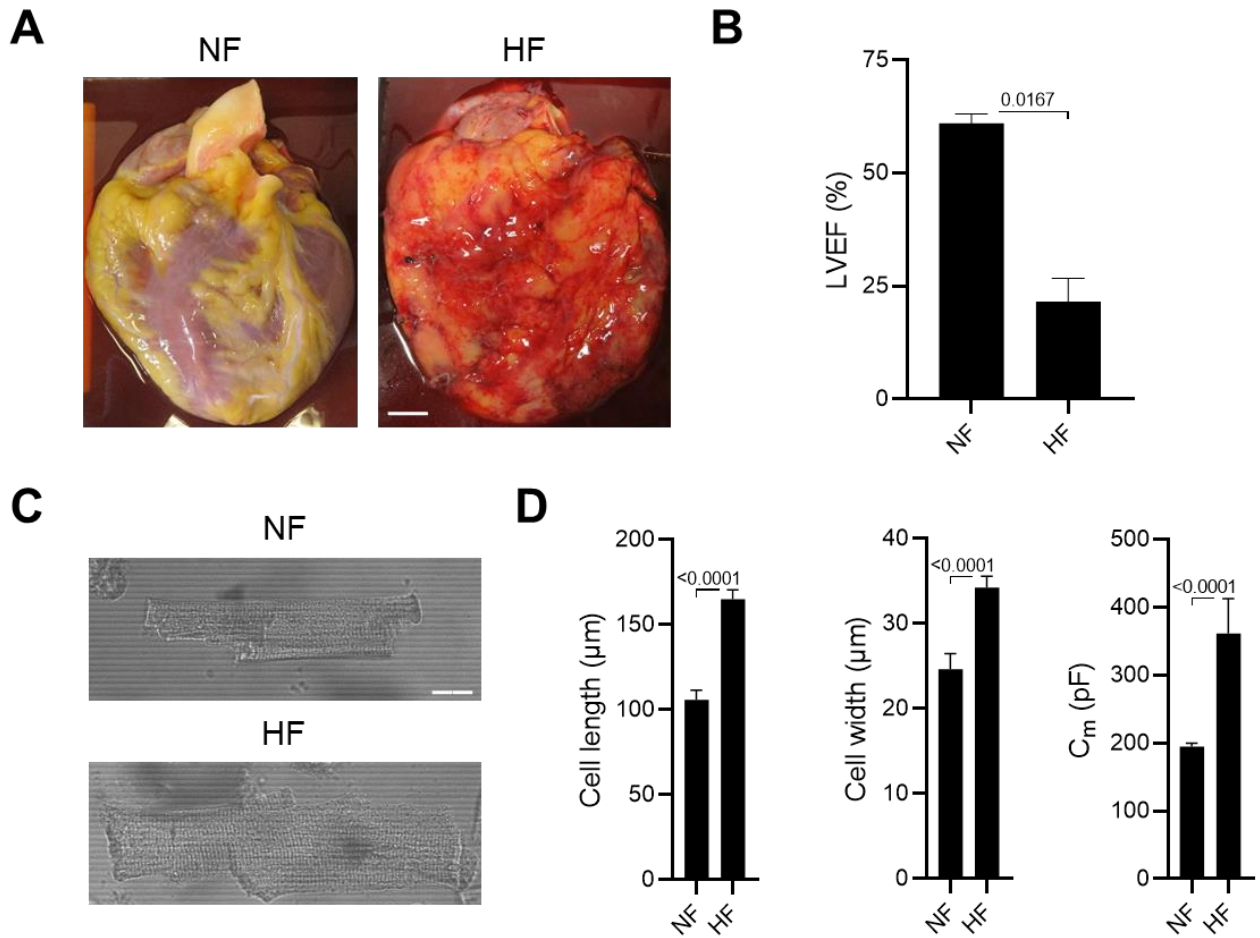

745

746 **Supplemental Figure 13. Remodeling in non-failing versus failing human hearts**  
 747 **and cardiomyocytes.**

748 (A) Photographs of non-failing (NF, left) vs failing human heart (HF, right). Scale bar  
 749 = 2 cm.

750 (B) Summary bar chart showing significantly decreased left ventricular ejection  
 751 fraction (LVEF) in failing as compared to non-failing human hearts (nested t-test;  
 752  $N_{NF/HF} = 3/14$ ).

753 (C) Transmitted light micrographs of left ventricular cardiomyocytes isolated from  
 754 non-failing (top) and failing (bottom) human hearts. Scale bar = 20  $\mu\text{m}$ .

755 (D) Summary bar charts showing significantly increased cell length, cell width and  
 756 membrane capacitance ( $C_m$ ) of left ventricular cardiomyocytes isolated from human  
 757 failing hearts as compared to non-failing hearts (nested t-test;  $N_{NF/HF} = 5/5$ ,  $n_{NF/HF} =$   
 758 24/59).

759

760

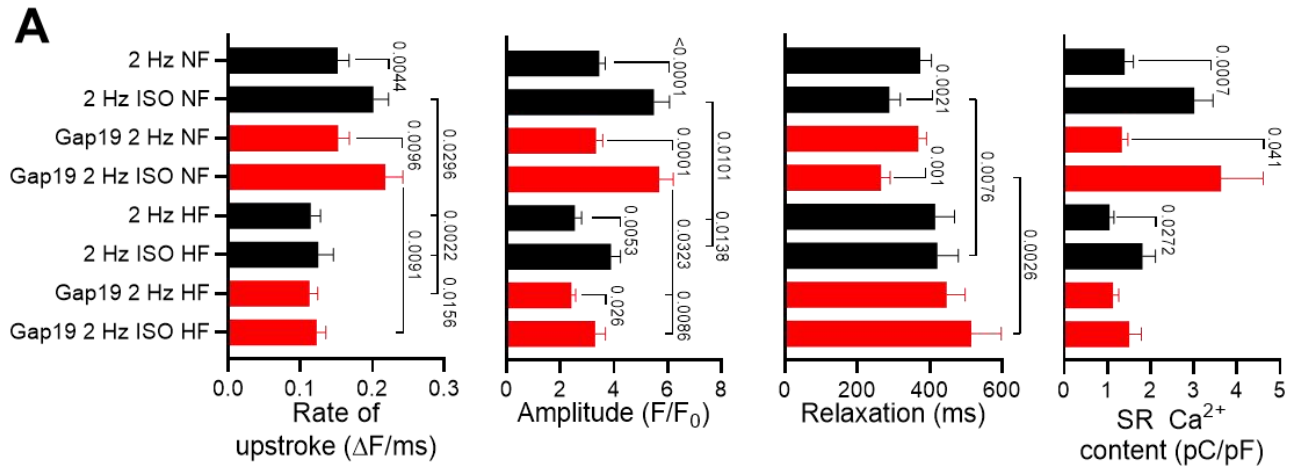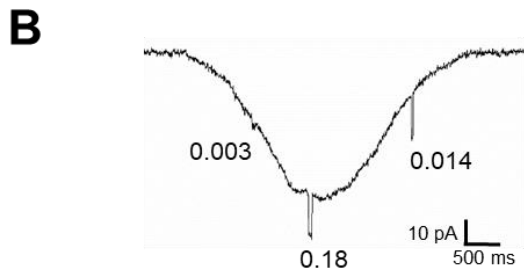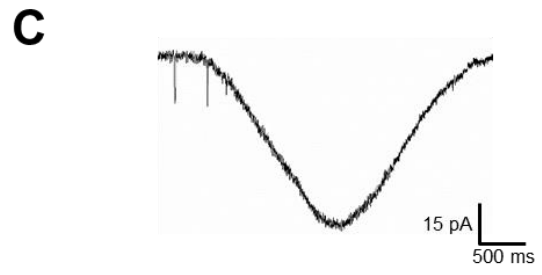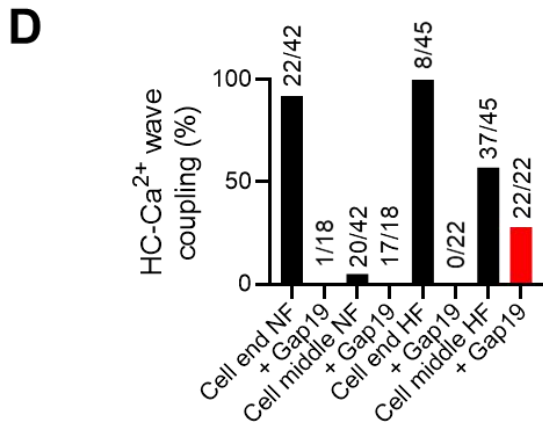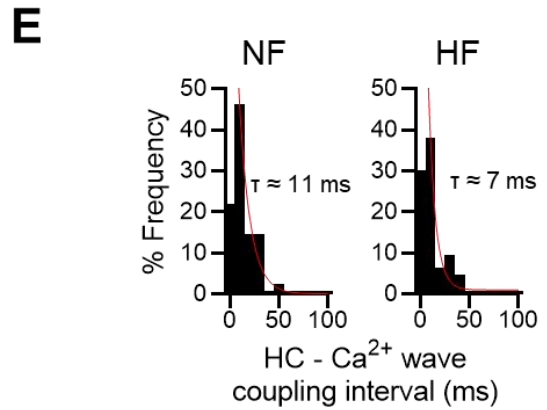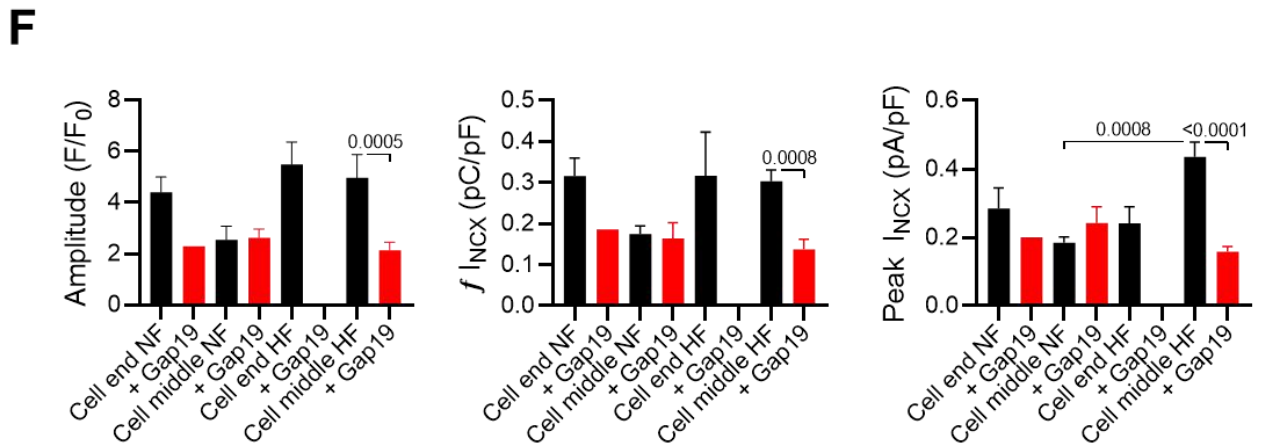

763 **Supplemental Figure 14. Changes in global Ca<sup>2+</sup> handling and hemichannel**  
764 **associated local Ca<sup>2+</sup> signaling in human heart failure with and without Gap19.**  
765 (A) Ca<sup>2+</sup> transient kinetics and SR Ca<sup>2+</sup> content at 2 Hz pacing ± ISO (10 nmol/L) and  
766 effects of Gap19 in left ventricular cardiomyocytes isolated from non-failing and  
767 failing human hearts (N<sub>NF/HF</sub> = 5/5, n<sub>NF/HF</sub> = 21-23/15-17 per condition; nested one-  
768 way ANOVA).  
769 (B) NCX current during spontaneous Ca<sup>2+</sup> release with superimposed unitary current  
770 activity. Numbers indicate unitary current event probability during rising, peak and  
771 recovery phase of NCX current.  
772 (C) Unitary current activity preceding spontaneous diastolic Ca<sup>2+</sup> release.  
773 (D) Fraction of Cx43 hemichannel (HC)-associated Ca<sup>2+</sup> release in left ventricular  
774 cardiomyocytes isolated from non-failing and failing human hearts (N<sub>NF/HF</sub> = 5/5,  
775 n<sub>NF/HF</sub> = 21-23/15-17 per condition). Bar chart indicates that HC-Ca<sup>2+</sup> release  
776 coupling is isolated in Ca<sup>2+</sup> waves originating from the cell end in non-failing  
777 cardiomyocytes. In failing cardiomyocytes, HC-associated Ca<sup>2+</sup> release originates  
778 from both the cell end and the cell middle. Gap19 abolished HC-associated Ca<sup>2+</sup>  
779 release. Numbers show absolute amounts of recorded Ca<sup>2+</sup> waves.  
780 (E) Histograms indicate time from hemichannel opening to start of Ca<sup>2+</sup> release for  
781 non-failing and failing human cardiomyocytes.  
782 (F) Bar charts summarizing properties of spontaneous diastolic Ca<sup>2+</sup> release and  
783 resulting NCX currents categorized based on origin in the presence or absence of  
784 Gap19 in left ventricular cardiomyocytes isolated from non-failing and failing human  
785 hearts (nested one-way ANOVA; N<sub>NF/HF</sub> = 5/5, n<sub>NF/HF</sub> = 21-23/15-17 per condition).  
786



787 **Supplemental Videos**

788 **Supplemental Video 1 and 2.** Focused ion beam-scanning electron microscopy  
789 (FIB-SEM) three-dimensional ultrastructure from murine left ventricle: intercalated  
790 disc overview and detail at the perinexus respectively.

791 **Supplemental Video 3 and 4.** Ca<sup>2+</sup> waves, recorded in murine left ventricular  
792 cardiomyocytes, originating from the cell middle and cell end respectively. White ROI  
793 indicates cell contour as determined by maximal intensity projection of fluorescence  
794 time course.

795

796 **Supplemental References**

- 797 1. Boengler K, Ruiz-Meana M, Gent S, Ungefug E, Soetkamp D, Miro-Casas E,  
798 et al. Mitochondrial connexin 43 impacts on respiratory complex i activity and  
799 mitochondrial oxygen consumption. *J Mol Cell Med.* 2012;16(8):1649-55.
- 800 2. Boengler K, Ungefug E, Heusch G, Leybaert L, and Schulz R. Connexin 43  
801 impacts on mitochondrial potassium uptake. *Front Pharmacol.* 2013;4:73.
- 802 3. Eckardt D, Theis M, Degen J, Ott T, Van Rijen HVM, Kirchhoff S, et al.  
803 Functional role of connexin43 gap junction channels in adult mouse heart  
804 assessed by inducible gene deletion. *J Mol Cell Cardiol.* 2004;36(1):101-10.
- 805 4. Jansen JA, Noorman M, Musa H, Stein M, de Jong S, van der Nagel R, et al.  
806 Reduced heterogeneous expression of Cx43 results in decreased Nav1.5  
807 expression and reduced sodium current that accounts for arrhythmia  
808 vulnerability in conditional Cx43 knockout mice. *Heart Rhythm.* 2012;9(4):600-  
809 7.
- 810 5. Jansen JA, Van Veen TAB, De Jong S, Van Der Nagel R, Van Stuijvenberg L,  
811 Driessen H, et al. Reduced Cx43 expression triggers increased fibrosis due to  
812 enhanced fibroblast activity. *Circ Arrhythm Electrophysiol.* 2012;5(2):380-90.
- 813 6. Stein M, van Veen TAB, Hauer RNW, de Bakker JMT, and van Rijen HVM. A  
814 50% reduction of excitability but not of intercellular coupling affects conduction  
815 velocity restitution and activation delay in the mouse heart. *PLoS One.*  
816 2011;6(6):e20310.
- 817 7. van Rijen HVM, Eckardt D, Degen J, Theis M, Ott T, Willecke K, et al. Slow  
818 conduction and enhanced anisotropy increase the propensity for ventricular  
819 tachyarrhythmias in adult mice with induced deletion of connexin43.  
820 *Circulation.* 2004;109(8):1048-55.

- 821 8. Reaume A, de Sousa P, Kulkarni S, Langille B, Zhu D, Davies T, et al. Cardiac  
822 malformation in neonatal mice lacking connexin43. *Science*.  
823 1995;267(5205):1831-4.
- 824 9. Dries E, Bito V, Lenaerts I, Antoons G, Sipido KR, and Macquaide N. Selective  
825 modulation of coupled ryanodine receptors during microdomain activation of  
826 calcium/calmodulin-dependent kinase II in the dyadic cleft. *Circ Res*.  
827 2013;113(11):1242-52.
- 828 10. Wang N, De Bock M, Decrock E, Bol M, Gadicherla A, Bultynck G, et al.  
829 Connexin targeting peptides as inhibitors of voltage- and intracellular Ca<sup>2+</sup>-  
830 triggered Cx43 hemichannel opening. *Neuropharmacology*. 2013;75:506-16.
- 831 11. Dries E, Santiago DJ, Gilbert G, Lenaerts I, Vandenberg B, Nagaraju CK, et al.  
832 Hyperactive ryanodine receptors in human heart failure and ischaemic  
833 cardiomyopathy reside outside of couplons. *Cardiovasc Res*.  
834 2018;114(11):1512-24.
- 835 12. Sipido KR, Stankovicova T, Flameng W, Vanhaecke J, and Verdonck F.  
836 Frequency dependence of Ca<sup>2+</sup> release from the sarcoplasmic reticulum in  
837 human ventricular myocytes from end-stage heart failure. *Cardiovasc Res*.  
838 1998;37(2):478-88.
- 839 13. Cerrone M, Lin X, Zhang M, Agullo-Pascual E, Pfenniger A, Chkourko Gusky  
840 H, et al. Missense mutations in plakophilin-2 cause sodium current deficit and  
841 associate with a brugada syndrome phenotype. *Circulation*.  
842 2014;129(10):1092-103.
- 843 14. Lin X, Liu N, Lu J, Zhang J, Anumonwo JMB, Isom LL, et al. Subcellular  
844 heterogeneity of sodium current properties in adult cardiac ventricular  
845 myocytes. *Heart Rhythm*. 2011;8(12):1923-30.

- 846 15. Rivaud MR, Agullo-Pascual E, Lin X, Leo-Macias A, Zhang M, Rothenberg E,  
847 et al. Sodium Channel Remodeling in Subcellular Microdomains of Murine  
848 Failing Cardiomyocytes. *J Am Heart Assoc.* 2017;6(12):e007622.
- 849 16. Bhargava A, Lin X, Novak P, Mehta K, Korchev Y, Delmar M, et al. Super-  
850 resolution scanning patch clamp reveals clustering of functional ion channels  
851 in adult ventricular myocyte. *Circ Res.* 2013;112(8):1112-20.
- 852 17. Sakmann B, Neher E, eds. *Single-Channel Recording.* New York: Plenum  
853 Press; 1995.
- 854 18. Ramanan SV, and Brink PR. Multichannel recordings from membranes which  
855 contain gap junctions. II. Substates and conductance shifts. *Biophys J.*  
856 1993;65(4):1387-95.
- 857 19. Wang HZ, Day N, Valcic M, Hsieh K, Serels S, Brink PR, et al. Intercellular  
858 communication in cultured human vascular smooth muscle cells. *Am J Physiol*  
859 *Cell Physiol.* 2001;281(1):C75-88.
- 860 20. Ester M, Kriegel H-P, Sander J, and Xu X. Density-Based Clustering in Spatial  
861 Databases: The Algorithm GDBSCAN and Its Applications. *Data Mining and*  
862 *Knowledge Discovery.* 1998;2:169-194.
- 863 21. Waterhouse A, Bertoni M, Bienert S, Studer G, Tauriello G, Gumienny R, et al.  
864 SWISS-MODEL: Homology modelling of protein structures and complexes.  
865 *Nucleic Acids Res.* 2018;46(W1):W296-W303.
- 866 22. Schneidman-Duhovny D, Inbar Y, Nussinov R, and Wolfson HJ. PatchDock  
867 and SymmDock: Servers for rigid and symmetric docking. *Nucleic Acids Res.*  
868 2005;33:W363-7.
- 869 23. Vanslebrouck B, Kremer A, Pavie B, van Roy F, Lippens S, and van Hengel  
870 J. Three-dimensional reconstruction of the intercalated disc including the

- 871 intercellular junctions by applying volume scanning electron microscopy.  
872 *Histochem Cell Biol.* 2018;149(5):479-90.
- 873 24. Jiang D, Xiao B, Yang D, Wang R, Choi P, Zhang L, et al. RyR2 mutations  
874 linked to ventricular tachycardia and sudden death reduce the threshold for  
875 store-overload-induced  $\text{Ca}^{2+}$  release (SOICR). *Proc Natl Acad Sci U S A.*  
876 2004;101(35):13062-7.
- 877 25. Lei CL, Clerx M, Whittaker DG, Gavaghan DJ, de Boer TP, and Mirams GR.  
878 Accounting for variability in ion current recordings using a mathematical model  
879 of artefacts in voltage-clamp experiments. *Philos Trans A Math Phys Eng Sci.*  
880 2020;378(2173):20190348.
- 881 26. Powell T, Terrar DA, and Twist VW. Electrical properties of individual cells  
882 isolated from adult rat ventricular myocardium. *J Physiol.* 1980;302(1):131-53.
- 883 27. Šimurda J, Šimurdová M, and Švecová O. A new simple approach to  
884 estimation of membrane capacitance from current responses to voltage clamp  
885 steps. *Progr Biophys Mol Biol.* 2020;157:18-23.
- 886 28. Ypey DL, Van Meerwijk WPM, Umar S, Pijnappels DA, Schlij MJ, and Van  
887 Der Laarse A. Depolarization-induced automaticity in rat ventricular  
888 cardiomyocytes is based on the gating properties of L-type calcium and slow  
889 Kv channels. *Eur Biophys J.* 2013;42(4):241-55.
- 890 29. Zanicani M, Cacciani F, and Groppi M. Effect of input resistance voltage-  
891 dependency on DC estimate of membrane capacitance in cardiac myocytes.  
892 *Biophys J.* 2005;89(3):2170-81.
- 893 30. Ibarra J, Morley GE, and Delmar M. Dynamics of the inward rectifier  $\text{K}^+$  current  
894 during the action potential of guinea pig ventricular myocytes. *Biophys J.*  
895 1991;60(6):1534-9.

- 896 31. Ten Tusscher KHWJ, Noble D, Noble PJ, and Panfilov AV. A model for human  
897 ventricular tissue. *Am J Physiol Heart Circ Physiol*. 2004;286(4):H1573-89.
- 898 32. O'Hara T, Virág L, Varró A, and Rudy Y. Simulation of the undiseased human  
899 cardiac ventricular action potential: Model formulation and experimental  
900 validation. *PLoS Comput Biol*. 2011;7(5):e1002061.
- 901 33. Frazier CJ, George EG, and Jones SW. Apparent change in ion selectivity  
902 caused by changes in intracellular K<sup>+</sup> during whole-cell recording. *Biophys J*.  
903 2000;78(4):1872-80.
- 904 34. Shimomura T, Yonekawa Y, Nagura H, Tateyama M, Fujiyoshi Y, and Irie K. A  
905 native prokaryotic voltage-dependent calcium channel with a novel selectivity  
906 filter sequence. *Elife*. 2020;9:e52828.
- 907 35. Hille B. *Ion channels of excitable membranes*. Sunderland, Mass: Sinauer;  
908 2001.
- 909 36. Atkins PW, De Paula J, Keeler J. *Atkins' Physical Chemistry*. Oxford University  
910 Press, 2018.
- 911 37. Wang HZ, and Veenstra RD. Monovalent ion selectivity sequences of the rat  
912 connexin43 gap junction channel. *J Gen Physiol*. 1997;109(4):491-507.
- 913 38. Dibb KM, Eisner DA, and Trafford AW. Regulation of systolic [Ca<sup>2+</sup>]<sub>i</sub> and  
914 cellular Ca<sup>2+</sup> flux balance in rat ventricular myocytes by SR Ca<sup>2+</sup>, L-type Ca<sup>2+</sup>  
915 current and diastolic [Ca<sup>2+</sup>]<sub>i</sub>. *J Physiol*. 2007;585(2):579-92.
- 916 39. Sankaranarayanan R, Kistamás K, Greensmith DJ, Venetucci LA, and Eisner  
917 DA. Systolic [Ca<sup>2+</sup>]<sub>i</sub> regulates diastolic levels in rat ventricular myocytes. *J*  
918 *Physiol*. 2017;595(16):5545-55.

- 919 40. Sipido KR, Maes M, and Van de Werf F. Low Efficiency of  $\text{Ca}^{2+}$  Entry Through  
920 the  $\text{Na}^+$ - $\text{Ca}^{2+}$  Exchanger as Trigger for  $\text{Ca}^{2+}$  Release From the Sarcoplasmic  
921 Reticulum. *Circ Res.* 1997;81(6):1034-44.
- 922 41. Cheng Y, Yu Z, Hoshijima M, Holst MJ, McCulloch AD, McCammon JA, et al.  
923 Numerical analysis of  $\text{Ca}^{2+}$  signaling in Rat Ventricular Myocytes with Realistic  
924 Transverse-Axial Tubular Geometry and Inhibited Sarcoplasmic Reticulum.  
925 *PLoS Comput Biol.* 2010;6(10):e1000972.
- 926 42. Trafford AW, Díaz ME, Sibbring GC, and Eisner DA. Modulation of CICR has  
927 no maintained effect on systolic  $\text{Ca}^{2+}$ : Simultaneous measurements of  
928 sarcoplasmic reticulum and sarcolemmal  $\text{Ca}^{2+}$  fluxes in rat ventricular  
929 myocytes. *J Physiol.* 2000;522(2):259-70.
- 930 43. Venetucci LA, Trafford AW, Díaz ME, O'Neill SC, and Eisner DA. Reducing  
931 ryanodine receptor open probability as a means to abolish spontaneous  $\text{Ca}^{2+}$   
932 release and increase  $\text{Ca}^{2+}$  transient amplitude in adult ventricular myocytes.  
933 *Circ Res.* 2006;98(10):1299-305.
- 934 44. Sigurdson W, Ruknudin A, and Sachs F. Calcium imaging of mechanically  
935 induced fluxes in tissue-cultured chick heart: Role of stretch-activated ion  
936 channels. *Am J Physiol.* 1992;262(4):H1110-5.
- 937 45. Díaz ME, Trafford AW, and Eisner DA. The effects of exogenous calcium  
938 buffers on the systolic calcium transient in rat ventricular myocytes. *Biophys J.*  
939 2001;80(4):1915-25.
- 940 46. Smith GL, and Eisner DA. Calcium Buffering in the Heart in Health and  
941 Disease. *Circulation.* 2019;139(20):2358-71.

- 942 47. Trafford AW, Díaz ME, and Eisner DA. A novel, rapid and reversible method to  
943 measure Ca buffering and time-course of total sarcoplasmic reticulum Ca  
944 content in cardiac ventricular myocytes. *Pflugers Arch.* 1999;437(3):501-3.
- 945 48. Trafford AW, Díaz ME, O'Neill SC, and Eisner DA. Comparison of  
946 subsarcolemmal and bulk calcium concentration during spontaneous calcium  
947 release in rat ventricular myocytes. *J Physiol.* 1995;488(3):577-86.
- 948 49. Hilgemann DW, Nicoll DA, and Philipson KD. Charge movement during Na<sup>+</sup>  
949 translocation by native and cloned cardiac Na<sup>+</sup>/Ca<sup>2+</sup> exchanger. *Nature.*  
950 1991;352(6337):715-8.
- 951 50. Weber CR, Ginsburg KS, Philipson KD, Shannon TR, and Bers DM. Allosteric  
952 regulation of Na/Ca exchange current by cytosolic Ca in intact cardiac  
953 myocytes. *J Gen Physiol.* 2001;117(2):119-31.
- 954 51. Weber CR, Piacentino V, Ginsburg KS, Houser SR, and Bers DM. Na<sup>+</sup>-Ca<sup>2+</sup>  
955 exchange current and submembrane [Ca<sup>2+</sup>] during the cardiac action potential.  
956 *Circ Res.* 2002;90(2):182-9.
- 957 52. Zhong M, Rees CM, Terentyev D, Choi BR, Koren G, and Karma A. NCX-  
958 Mediated Subcellular Ca<sup>2+</sup> Dynamics Underlying Early Afterdepolarizations in  
959 LQT2 Cardiomyocytes. *Biophys J.* 2018;115(6):1019-32.
- 960 53. Cannell MB, and Soeller C. Numerical analysis of ryanodine receptor  
961 activation by L-type channel activity in the cardiac muscle diad. *Biophys J.*  
962 1997;73(1):112-22.
- 963 54. Tao T, O'Neill SC, Diaz ME, Li YT, Eisner DA, and Zhang H. Alternans of  
964 cardiac calcium cycling in a cluster of ryanodine receptors: A simulation study.  
965 *Am J Physiol Heart Circ Physiol.* 2008;295(2):H598-H609.



- 966 55. Michailova A, DeIPrincipe F, Egger M, and Niggli E. Spatiotemporal features of  
967  $\text{Ca}^{2+}$  buffering and diffusion in atrial cardiac myocytes with inhibited  
968 sarcoplasmic reticulum. *Biophys J*. 2002;83(6):3134-51.
- 969 56. Cannell MB, Kong CHT, Imtiaz MS, and Laver DR. Control of sarcoplasmic  
970 reticulum  $\text{Ca}^{2+}$  release by stochastic RyR gating within a 3D model of the  
971 cardiac dyad and importance of induction decay for CICR termination. *Biophys*  
972 *J*. 2013;104(10):2149-59.
- 973 57. Wescott AP, Jafri MS, Lederer WJ, and Williams GSB. Ryanodine receptor  
974 sensitivity governs the stability and synchrony of local calcium release during  
975 cardiac excitation-contraction coupling. *J Mol Cell Cardiol*. 2016;92:82-92.
- 976 58. Mejía-Alvarez R, Kettlun C, Ríos E, Stern M, and Fill M. Unitary  $\text{Ca}^{2+}$  current  
977 through cardiac ryanodine receptor channels under quasi-physiological ionic  
978 conditions. *J Gen Physiol*. 1999;113(2):177-86.
- 979
